# Supplementary material for: Control of the Inflammatory Macrophage Transcriptional Signature by miR-155
Source: PLoS One. 2016 Jul 22;11(7):e0159724. doi: 10.1371/journal.pone.0159724 (PMC4957803; doi:10.1371/journal.pone.0159724)
Supplement: S1 Table — (XLSX) [file pone.0159724.s002.xlsx]

## Sheet: Table S1
Table S1. Genes increased more than 2-fold in KO M1 vs. KO M0 macrophages
Name	Description	Fold Change KOM1 vs KOM0	p-value KOM1 vs. KOM0		Mean Class Expr KOM0	Mean Class Expr KOM1
1418652_at	chemokine (C-X-C motif) ligand 9, Cxcl9	91.83	0.0444156		37.88	3478.52
1427747_a_at	lipocalin 2, Lcn2	52.558	0.0135167		149.68	7866.91
1450136_at	CD38 antigen, Cd38	41.339	0.00152594		30.6	1264.98
1456212_x_at	suppressor of cytokine signaling 3, Socs3	34.4	0.00166636		43.77	1505.69
1417314_at	complement component 2 (within H-2S) /// complement factor B, C2 /// Cfb	31.867	0.0398739		98.36	3134.46
1455899_x_at	suppressor of cytokine signaling 3, Socs3	29.877	0.00371222		67.53	2017.6
1433741_at	CD38 antigen, Cd38	28.355	0.00162247		134.9	3825.11
1430886_at	RIKEN cDNA 1700112E06 gene, 1700112E06Rik	24.517	0.0274104		9.52	233.4
1416576_at	suppressor of cytokine signaling 3, Socs3	16.839	0.00210092		76.07	1280.95
1431008_at	histocompatibility 2, Q region locus 6 /// histocompatibility 2, Q region locus 6-like, H2-Q6 /// LOC68395	13.158	0.0265404		288.36	3794.12
1419202_at	cystatin F (leukocystatin), Cst7	12.768	0.000862409		218.59	2790.86
1436555_at	solute carrier family 7 (cationic amino acid transporter, y+ system), member 2, Slc7a2	11.708	0.0345691		23.06	269.98
1418536_at	histocompatibility 2, Q region locus 7, H2-Q7	11.133	0.00371758		452.47	5037.3
1445639_at	RIKEN cDNA 9130014G24 gene, 9130014G24Rik	10.745	0.0010767		7.95	85.42
1420591_at	G protein-coupled receptor 84, Gpr84	10.681	0.00832349		181.52	1938.82
1422953_at	formyl peptide receptor 2, Fpr2	10.622	0.00468181		770.61	8185.73
1421473_at	interleukin 1 alpha, Il1a	10.158	6.59331e-05		25.74	261.46
1448881_at	haptoglobin, Hp	10.142	0.00036449		146.53	1486.18
1460283_at	Mediterranean fever, Mefv	9.985	0.0306464		113.86	1136.91
1426008_a_at	solute carrier family 7 (cationic amino acid transporter, y+ system), member 2, Slc7a2	9.973	0.0449857		23.74	236.77
1417185_at	lymphocyte antigen 6 complex, locus A, Ly6a	8.982	0.011175		593.26	5328.5
1430802_at	histocompatibility 2, Q region locus 8, H2-Q8	8.167	0.0298503		134.34	1097.13
1451335_at	placenta-specific 8, Plac8	7.941	0.000450713		21.56	171.2
1449450_at	prostaglandin E synthase, Ptges	7.826	0.0227037		93.74	733.64
1420330_at	C-type lectin domain family 4, member e, Clec4e	7.497	0.0276351		801.79	6011.16
1430887_s_at	RIKEN cDNA 1700112E06 gene, 1700112E06Rik	7.323	0.0128547		82.39	603.37
1448123_s_at	transforming growth factor, beta induced, Tgfbi	7.079	0.046177		1258.24	8907.65
1439747_at	prostaglandin E synthase, Ptges	6.732	0.0335001		44.81	301.65
1416432_at	6-phosphofructo-2-kinase/fructose-2,6-biphosphatase 3, Pfkfb3	6.531	0.00206		299.34	1955.13
1421304_at	killer cell lectin-like receptor, subfamily A, member 2, Klra2	6.41	0.0462906		12.55	80.45
1451446_at	anthrax toxin receptor 1, Antxr1	6.242	0.00667294		13.99	87.33
1454976_at	superoxide dismutase 2, mitochondrial, Sod2	5.849	0.0132842		200.17	1170.78
1419665_a_at	nuclear protein 1, Nupr1	5.58	0.00772104		405.12	2260.54
1434786_at	protein phosphatase 1, regulatory (inhibitor) subunit 12B, Ppp1r12b	5.572	0.0388476		48.63	270.98
1419684_at	chemokine (C-C motif) ligand 8, Ccl8	5.571	0.00084828		189.9	1057.93
1449305_at	coagulation factor X, F10	5.567	0.0333702		120.09	668.5
1428484_at	oxysterol binding protein-like 3, Osbpl3	5.478	3.84628e-05		296.67	1625.17
1440920_at	matrix metallopeptidase 14 (membrane-inserted), Mmp14	5.45	0.00154564		121.97	664.7
1425663_at	interleukin 1 receptor antagonist, Il1rn	5.344	0.0208035		270.32	1444.64
1455393_at	ceruloplasmin, Cp	5.166	0.048612		276.99	1431
1417300_at	sphingomyelin phosphodiesterase, acid-like 3B, Smpdl3b	5.097	0.00209699		189.33	965.09
1419666_x_at	nuclear protein 1, Nupr1	5.077	0.00516882		308.35	1565.36
1456250_x_at	transforming growth factor, beta induced, Tgfbi	4.998	0.0335996		1017.55	5085.45
1422771_at	MAD homolog 6 (Drosophila), Smad6	4.995	0.0106826		19.03	95.05
1417494_a_at	ceruloplasmin, Cp	4.987	0.0157738		414.52	2067.21
1418186_at	glutathione S-transferase, theta 1, Gstt1	4.815	5.05776e-06		49.09	236.39
1437463_x_at	transforming growth factor, beta induced, Tgfbi	4.801	0.030891		723.86	3475.46
1417495_x_at	ceruloplasmin, Cp	4.781	0.0332683		325.45	1555.97
1422474_at	phosphodiesterase 4B, cAMP specific, Pde4b	4.78	0.00244066		140.79	672.95
1448610_a_at	superoxide dismutase 2, mitochondrial, Sod2	4.777	0.00894881		2113.62	10097.2
1448734_at	ceruloplasmin, Cp	4.761	0.0312625		276.79	1317.67
1424444_a_at	RIKEN cDNA 1600014C10 gene, 1600014C10Rik	4.719	0.0382233		678.03	3199.41
1418992_at	coagulation factor X, F10	4.649	0.00783654		17.91	83.27
1435040_at	interleukin-1 receptor-associated kinase 3, Irak3	4.597	0.0325958		403.75	1856.14
1420981_a_at	LIM domain only 4, Lmo4	4.548	0.0039348		459.22	2088.44
1417193_at	superoxide dismutase 2, mitochondrial, Sod2	4.443	0.00752425		2234.48	9926.77
1448383_at	matrix metallopeptidase 14 (membrane-inserted), Mmp14	4.312	0.00312298		786.06	3389.6
1422473_at	phosphodiesterase 4B, cAMP specific, Pde4b	4.207	0.0185738		68.72	289.13
1421571_a_at	lymphocyte antigen 6 complex, locus C1 /// lymphocyte antigen 6 complex, locus C2, Ly6c1 /// Ly6c2	4.156	0.00779307		63.71	264.78
1419075_s_at	serum amyloid A 1, Saa1	4.139	0.0269847		14.7	60.85
1434447_at	met proto-oncogene, Met	4.013	0.00841321		31.97	128.31
1451798_at	interleukin 1 receptor antagonist, Il1rn	3.97	0.0365741		496.67	1971.67
1416239_at	argininosuccinate synthetase 1, Ass1	3.938	0.00654189		630.33	2482.05
1428750_at	CDC42 effector protein (Rho GTPase binding) 2, Cdc42ep2	3.911	0.000225664		235.29	920.2
1423289_a_at	RIKEN cDNA 1810029B16 gene, 1810029B16Rik	3.899	0.0286081		239.44	933.66
1454656_at	spermatogenesis associated 13, Spata13	3.896	0.00627506		103.61	403.68
1417703_at	poliovirus receptor-related 2, Pvrl2	3.839	0.000994428		101.04	387.88
1423017_a_at	interleukin 1 receptor antagonist, Il1rn	3.829	0.0357552		469.55	1798.13
1416572_at	matrix metallopeptidase 14 (membrane-inserted), Mmp14	3.801	7.84834e-05		408.14	1551.24
1438157_s_at	nuclear factor of kappa light polypeptide gene enhancer in B-cells inhibitor, alpha, Nfkbia	3.78	0.0301959		944.54	3570.14
1444531_at		3.758	0.00913094		59.31	222.89
1421463_at	sialic acid binding Ig-like lectin E, Siglece	3.653	0.0116885		51.48	188.08
1419647_a_at	immediate early response 3, Ier3	3.635	0.0290907		584.24	2123.56
1450826_a_at	serum amyloid A 3, Saa3	3.61	0.0125053		6048.36	21836.1
1442700_at	phosphodiesterase 4B, cAMP specific, Pde4b	3.594	0.000446053		83.59	300.41
1451721_a_at	histocompatibility 2, class II antigen A, beta 1, H2-Ab1	3.554	0.0100243		258.66	919.38
1455197_at	Rho family GTPase 1, Rnd1	3.522	0.0239161		15.22	53.6
1425367_at	integrin alpha L, Itgal	3.462	0.025036		318.2	1101.76
1435560_at	integrin alpha L, Itgal	3.441	0.0358702		1161.23	3996.26
1455606_at	NEDD4 binding protein 1, N4bp1	3.43	0.000514802		440.03	1509.3
1437865_at	spermatogenesis associated 13, Spata13	3.421	0.0184017		73.69	252.12
1418154_at	NEDD4 binding protein 1, N4bp1	3.405	0.0047872		432.27	1472.08
1418133_at	B-cell leukemia/lymphoma 3, Bcl3	3.379	0.0127459		238.26	805.05
1438684_at	NUAK family, SNF1-like kinase, 1, Nuak1	3.356	0.0023942		121.69	408.39
1423626_at	dystonin, Dst	3.315	0.0369084		144.34	478.48
1425404_a_at	transmembrane protein 110, Tmem110	3.291	0.0367392		99.26	326.69
1458683_at	signal-regulatory protein beta 1A, Sirpb1a	3.285	0.0271504		489.09	1606.9
1450788_at	serum amyloid A 1, Saa1	3.281	0.0222567		7.5	24.61
1418993_s_at	coagulation factor X, F10	3.28	0.014007		61.61	202.08
1438724_at	oxysterol binding protein-like 3, Osbpl3	3.265	0.00941001		52.51	171.47
1427994_at	CD300 antigen like family member F, Cd300lf	3.252	0.0158713		365.63	1189.01
1421276_a_at	dystonin, Dst	3.25	0.000919625		81.18	263.85
1427844_a_at	CCAAT/enhancer binding protein (C/EBP), beta, Cebpb	3.207	0.00497233		709.77	2276.13
1450648_s_at	histocompatibility 2, class II antigen A, beta 1, H2-Ab1	3.194	0.0151719		738.65	2359.61
1434372_at	expressed sequence AW112010, AW112010	3.193	0.00479941		3308.2	10563.7
1422965_at	angiotensin II, type I receptor-associated protein, Agtrap	3.114	0.010924		343.2	1068.89
1446957_s_at	NEDD4 binding protein 1, N4bp1	3.101	0.0305537		323.2	1002.34
1419031_at	fatty acid desaturase 2, Fads2	3.061	0.0060676		60.39	184.88
1452214_at	SKI-like, Skil	3.053	0.00383273		857.8	2619.04
1440209_at	membrane-associated ring finger (C3HC4) 1, March1	3.043	0.0145647		221.18	673.1
1452928_at	ABI gene family, member 3, Abi3	3.041	0.00041684		459.63	1397.54
1448110_at	sema domain, immunoglobulin domain (Ig), transmembrane domain (TM) and short cytoplasmic domain, (semaphorin) 4A, Sema4a	3.031	0.0272926		389.77	1181.23
1440666_at	RIKEN cDNA 4933430I17 gene, 4933430I17Rik	3.02	0.0376185		19.7	59.49
1422041_at	paired immunoglobin-like type 2 receptor beta 1, Pilrb1	3.016	0.0172313		604.82	1824.31
1451097_at	vasodilator-stimulated phosphoprotein, Vasp	2.993	0.00395599		998.41	2988.4
1450350_a_at	Jun dimerization protein 2, Jdp2	2.973	0.00835273		202.42	601.7
1424211_at	solute carrier family 25, member 33, Slc25a33	2.954	0.00522186		97.5	288
1456676_a_at	6-phosphofructo-2-kinase/fructose-2,6-biphosphatase 3, Pfkfb3	2.952	0.0303855		61.32	181.04
1418126_at	chemokine (C-C motif) ligand 5, Ccl5	2.94	0.00435902		6948.71	20427.4
1417244_a_at	interferon regulatory factor 7, Irf7	2.937	0.0226971		2678.87	7868.41
1449454_at	bone marrow stromal cell antigen 1, Bst1	2.926	0.016545		58.33	170.65
1434763_at	ORAI calcium release-activated calcium modulator 2, Orai2	2.921	0.0105755		88.03	257.12
1419132_at	toll-like receptor 2, Tlr2	2.92	0.0324627		730.91	2134.58
1432399_a_at	Eph receptor A1, Epha1	2.913	0.0082862		64.74	188.56
1435226_at	ring finger protein 19B, Rnf19b	2.865	0.0354094		435.98	1249.07
1448025_at	signal-regulatory protein beta 1-like /// signal-regulatory protein beta 1A /// signal-regulatory protein beta 1B, LOC100038947 /// Sirpb1a /// Sirpb1b	2.863	0.0131421		763.39	2185.27
1425902_a_at	nuclear factor of kappa light polypeptide gene enhancer in B-cells 2, p49/p100, Nfkb2	2.855	0.0159184		309.77	884.27
1451344_at	transmembrane protein 119, Tmem119	2.804	0.00439093		104.12	291.91
1449453_at	bone marrow stromal cell antigen 1, Bst1	2.798	0.0196591		255.63	715.23
1421287_a_at	platelet/endothelial cell adhesion molecule 1, Pecam1	2.774	0.0146341		27.17	75.37
1422612_at	hexokinase 2, Hk2	2.769	0.00555545		462.15	1279.67
1420088_at	nuclear factor of kappa light polypeptide gene enhancer in B-cells inhibitor, alpha, Nfkbia	2.769	0.0209392		4508.28	12483.4
1418901_at	CCAAT/enhancer binding protein (C/EBP), beta, Cebpb	2.759	0.00736629		1456.99	4019.45
1425477_x_at	histocompatibility 2, class II antigen A, beta 1, H2-Ab1	2.748	0.0193079		172.81	474.9
1421811_at	thrombospondin 1, Thbs1	2.743	0.0157536		1009.36	2768.71
1434955_at	membrane-associated ring finger (C3HC4) 1, March1	2.733	0.0187309		366.53	1001.8
1417194_at	superoxide dismutase 2, mitochondrial, Sod2	2.71	0.00610574		56.73	153.74
1448026_at	chromodomain helicase DNA binding protein 7, Chd7	2.686	0.0454628		40.5	108.78
1418634_at	Notch gene homolog 1 (Drosophila), Notch1	2.675	0.0114906		516.72	1382.45
1434762_at	ORAI calcium release-activated calcium modulator 2, Orai2	2.669	0.049501		93.51	249.59
1445452_at	TNF receptor-associated factor 1, Traf1	2.667	0.000401537		37.28	99.42
1418099_at	tumor necrosis factor receptor superfamily, member 1b, Tnfrsf1b	2.648	0.0270124		2089.34	5532.84
1455405_at	proline-serine-threonine phosphatase-interacting protein 2, Pstpip2	2.641	0.0321928		182.78	482.72
1449449_at	prostaglandin E synthase, Ptges	2.639	0.0355818		32.71	86.32
1435476_a_at	Fc receptor, IgG, low affinity IIb, Fcgr2b	2.634	0.0153429		2217.39	5839.5
1434015_at	solute carrier family 2 (facilitated glucose transporter), member 6, Slc2a6	2.625	0.0278889		326.52	857.11
1431609_a_at	acid phosphatase 5, tartrate resistant, Acp5	2.62	0.0404053		372.97	977.09
1448735_at	ceruloplasmin, Cp	2.617	0.0346808		27.55	72.1
1427327_at	paired immunoglobin-like type 2 receptor alpha, Pilra	2.605	0.00471344		463.54	1207.55
1449310_at	prostaglandin E receptor 2 (subtype EP2), Ptger2	2.603	0.00722532		203.03	528.43
1428733_at	guanine nucleotide binding protein (G protein), gamma transducing activity polypeptide 2, Gngt2	2.6	0.02068		290.13	754.28
1455771_at	benzodiazapine receptor associated protein 1, Bzrap1	2.598	0.034377		68.57	178.14
1438498_at	zinc finger, MYND-type containing 15, Zmynd15	2.598	0.00146709		130.94	340.12
1449147_at	carbohydrate (keratan sulfate Gal-6) sulfotransferase 1, Chst1	2.591	0.0102561		19.95	51.7
1457359_at	inositol polyphosphate-4-phosphatase, type II, Inpp4b	2.587	0.0214082		38.22	98.88
1424842_a_at	Rho GTPase activating protein 24, Arhgap24	2.587	0.0143942		120.41	311.47
1423267_s_at	integrin alpha 5 (fibronectin receptor alpha), Itga5	2.578	0.000604099		145.28	374.59
1426315_a_at	RIKEN cDNA 6330416G13 gene, 6330416G13Rik	2.565	0.00141591		339.21	869.96
1416381_a_at	peroxiredoxin 5, Prdx5	2.564	0.00384654		3408.94	8740.08
1442994_at		2.552	0.00033488		7.52	19.19
1421034_a_at	interleukin 4 receptor, alpha, Il4ra	2.548	0.00546153		381.37	971.92
1452015_at	RIKEN cDNA 6330416G13 gene, 6330416G13Rik	2.51	0.0263828		125.63	315.27
1448830_at	dual specificity phosphatase 1, Dusp1	2.507	0.0104461		2286.43	5731.88
1434046_at	expressed sequence AA467197, AA467197	2.489	0.0235205		45.18	112.46
1424456_at	poliovirus receptor-related 2, Pvrl2	2.486	0.0334105		76.2	189.45
1418929_at	intraflagellar transport 57 homolog (Chlamydomonas), Ift57	2.464	0.0335177		149.25	367.73
1418401_a_at	dual specificity phosphatase 16, Dusp16	2.46	0.00627387		178.56	439.29
1434283_at	AT rich interactive domain 5B (MRF1-like), Arid5b	2.458	0.0383437		520.84	1279.99
1450488_at	chemokine (C-C motif) ligand 24, Ccl24	2.439	0.00265343		70.81	172.69
1454606_at	RIKEN cDNA 4933426M11 gene, 4933426M11Rik	2.436	0.0344536		944.79	2301.3
1441516_a_at	RIKEN cDNA C130050O18 gene, C130050O18Rik	2.428	0.00256081		112.87	274.07
1421221_at	beta-carotene oxygenase 2, Bco2	2.41	0.0456096		52.27	125.99
1456857_at	RIKEN cDNA 1500011B03 gene, 1500011B03Rik	2.404	0.0142036		95.35	229.26
1452741_s_at	glycerol phosphate dehydrogenase 2, mitochondrial, Gpd2	2.402	0.000494077		69.5	166.96
1424524_at	DNA-damage regulated autophagy modulator 1, Dram1	2.385	0.0122343		827.39	1973.65
1427691_a_at	interferon (alpha and beta) receptor 2, Ifnar2	2.375	0.0261587		321.19	762.86
1428279_a_at	ataxin 7-like 1, Atxn7l1	2.37	0.0245437		256.36	607.46
1435477_s_at	Fc receptor, IgG, low affinity IIb, Fcgr2b	2.367	0.00769031		3173.61	7512.31
1455497_at	leukocyte receptor cluster (LRC) member 9, Leng9	2.362	0.0258256		71.6	169.15
1430700_a_at	phospholipase A2, group VII (platelet-activating factor acetylhydrolase, plasma), Pla2g7	2.35	0.00285722		2707.72	6363.9
1423401_at	ets variant gene 6 (TEL oncogene), Etv6	2.348	0.0212896		110.28	258.92
1440169_x_at	interferon (alpha and beta) receptor 2, Ifnar2	2.335	0.00665794		372.58	870.04
1450764_at	acyloxyacyl hydrolase, Aoah	2.328	0.0205029		699.26	1627.74
1429359_s_at	RNA binding protein gene with multiple splicing, Rbpms	2.321	0.0197578		34.84	80.85
1455332_x_at	Fc receptor, IgG, low affinity IIb, Fcgr2b	2.315	0.0106513		2075.12	4803.36
1448788_at	CD200 antigen, Cd200	2.303	0.00827027		42.3	97.43
1434945_at	lysophosphatidylcholine acyltransferase 2, Lpcat2	2.295	0.00481554		798.85	1833.26
1434316_at	chondroitin sulfate synthase 1, Chsy1	2.294	0.0484341		225.6	517.54
1417929_at	solute carrier family 7 (cationic amino acid transporter, y+ system), member 8, Slc7a8	2.291	0.00682851		185.38	424.63
1429123_at	RAB27A, member RAS oncogene family, Rab27a	2.29	0.041246		53.63	122.83
1427689_a_at	TNFAIP3 interacting protein 1, Tnip1	2.29	0.0385809		1422.97	3258.94
1444524_at	predicted gene 14005, Gm14005	2.284	0.0305797		97.91	223.59
1428323_at	glycerol phosphate dehydrogenase 2, mitochondrial, Gpd2	2.276	0.00546762		307.65	700.29
1430835_at	coiled-coil domain containing 125, Ccdc125	2.255	0.0426673		51.47	116.08
1424023_at	cytosolic thiouridylase subunit 1 homolog (S. pombe), Ctu1	2.247	0.0205584		189.85	426.52
1449040_a_at	selenophosphate synthetase 2, Sephs2	2.243	0.00290684		489.42	1097.76
1451139_at	solute carrier family 39 (zinc transporter), member 4, Slc39a4	2.242	0.01762		89.64	200.93
1455285_at	solute carrier family 31, member 1, Slc31a1	2.241	0.0469602		786.44	1762.09
1417434_at	glycerol phosphate dehydrogenase 2, mitochondrial, Gpd2	2.24	0.00262063		472.13	1057.64
1424614_at	post-GPI attachment to proteins 2, Pgap2	2.24	0.0117811		1593.45	3569.47
1460596_at	angiotensin II, type I receptor-associated protein, Agtrap	2.231	0.0358264		372.96	831.98
1433943_at	inositol 1,4,5-triphosphate receptor interacting protein, Itprip	2.23	0.00628043		47.45	105.81
1417856_at	avian reticuloendotheliosis viral (v-rel) oncogene related B, Relb	2.22	0.0217141		300.49	667.16
1457063_at		2.213	0.0170614		35.02	77.5
1434556_at	transmembrane protein 170B, Tmem170b	2.21	0.00068794		290.74	642.5
1456251_x_at	translocator protein, Tspo	2.204	0.0371509		1502.09	3310.9
1451941_a_at	Fc receptor, IgG, low affinity IIb, Fcgr2b	2.184	0.0150803		3309.14	7227
1415899_at	Jun-B oncogene, Junb	2.184	0.00163813		277.76	606.74
1446834_at	Cathepsin C, Ctsc	2.182	0.0280255		32.78	71.51
1438948_x_at	translocator protein, Tspo	2.177	0.0263147		1974.59	4298.33
1448657_a_at	DnaJ (Hsp40) homolog, subfamily B, member 2, Dnajb2	2.172	0.0198161		96.74	210.14
1426568_at	solute carrier family 2 (facilitated glucose transporter), member 9, Slc2a9	2.165	0.0117825		80.21	173.66
1422924_at	tumor necrosis factor (ligand) superfamily, member 9, Tnfsf9	2.164	0.00499317		110.27	238.6
1460156_at	acyloxyacyl hydrolase, Aoah	2.159	0.0289398		57.25	123.61
1420723_at	vanin 3, Vnn3	2.154	0.0152953		54.23	116.79
1417884_at	solute carrier family 16 (monocarboxylic acid transporters), member 6, Slc16a6	2.153	0.0293763		538.66	1159.63
1424393_s_at	alcohol dehydrogenase, iron containing, 1, Adhfe1	2.146	0.0124513		21.95	47.1
1436788_at	acid phosphatase 2, lysosomal, Acp2	2.142	0.000120119		894.44	1915.57
1416041_at	serum/glucocorticoid regulated kinase 1, Sgk1	2.139	0.0288798		1230.84	2633.12
1444178_at	predicted gene 9895 /// hypothetical LOC100503337, Gm9895 /// LOC100503337	2.134	0.00885839		48.51	103.52
1424392_at	alcohol dehydrogenase, iron containing, 1, Adhfe1	2.13	0.0078578		20.6	43.87
1418444_a_at	glycerophosphodiester phosphodiesterase 1, Gde1	2.122	0.045832		722.61	1533.02
1433750_at	solute carrier family 31, member 1, Slc31a1	2.111	0.0438249		464.22	980.2
1454171_x_at	RIKEN cDNA 9530053H05 gene, 9530053H05Rik	2.104	9.11328e-05		289.38	608.92
1418325_at	selenophosphate synthetase 2, Sephs2	2.101	0.00218129		441.09	926.78
1424615_at	post-GPI attachment to proteins 2, Pgap2	2.098	0.0177166		1796.8	3769.23
1419708_at	wingless-related MMTV integration site 6, Wnt6	2.098	0.0369984		58.76	123.25
1455229_x_at	phosphatidylglycerophosphate synthase 1, Pgs1	2.087	0.0432312		232.1	484.41
1424448_at	tripartite motif-containing 6, Trim6	2.086	0.0473823		26.17	54.6
1447223_at		2.085	0.00494135		100.94	210.51
1449222_at	Epstein-Barr virus induced gene 3, Ebi3	2.082	0.00201183		1807.88	3763.31
1433811_at	myeloid/lymphoid or mixed-lineage leukemia (trithorax homolog, Drosophila); translocated to, 6, Mllt6	2.079	0.0163475		469.53	976.26
1437161_x_at	RNA binding protein gene with multiple splicing, Rbpms	2.075	0.000936913		106.59	221.18
1435784_at	autophagy-related 9A (yeast), Atg9a	2.067	0.0420763		169.51	350.32
1433453_a_at	ankyrin repeat and BTB (POZ) domain containing 2, Abtb2	2.063	0.0258585		42.07	86.81
1439057_x_at	zinc finger, DHHC domain containing 6, Zdhhc6	2.052	0.0134094		1102.65	2263.02
1434880_at	ets variant gene 6 (TEL oncogene), Etv6	2.048	0.00168752		447.73	916.93
1437724_x_at	phosphatidylinositol transfer protein, membrane-associated 1, Pitpnm1	2.042	0.0233784		832.1	1699.34
1416527_at	RAB32, member RAS oncogene family, Rab32	2.041	0.03958		889.01	1814.68
1416378_at	polynucleotide kinase 3'- phosphatase, Pnkp	2.04	0.0178655		420.84	858.41
1426704_at	cyclin G associated kinase, Gak	2.031	0.0239125		11.12	22.59
1416592_at	glutaredoxin, Glrx	2.031	0.0137031		2740.44	5566.14
1428082_at	acyl-CoA synthetase long-chain family member 5, Acsl5	2.027	0.0385504		1549.14	3139.68
1441400_at	RIKEN cDNA 1810029B16 gene, 1810029B16Rik	2.027	0.0263932		29.1	59
1448134_at	cDNA sequence X99384, X99384	2.026	0.00824908		86.12	174.49
1455936_a_at	RNA binding protein gene with multiple splicing, Rbpms	2.025	0.0286867		29.73	60.19
1435602_at		2.024	0.0113992		224.93	455.28
1438763_at	dynein, axonemal, heavy chain 2, Dnahc2	2.021	0.0338287		158.95	321.18
1428942_at	metallothionein 2, Mt2	2.018	0.00454624		752.5	1518.83
1418633_at	Notch gene homolog 1 (Drosophila), Notch1	2.015	0.0353009		105.28	212.17
1416992_at	MFNG O-fucosylpeptide 3-beta-N-acetylglucosaminyltransferase, Mfng	2.009	0.00798103		164.98	331.47
1424172_at	hydroxyacyl glutathione hydrolase, Hagh	2.008	0.0135251		470.4	944.78
1423996_a_at	interleukin 4 receptor, alpha, Il4ra	2.008	0.0231273		303.5	609.38
