# Supplementary material for: Control of the Inflammatory Macrophage Transcriptional Signature by miR-155
Source: PLoS One. 2016 Jul 22;11(7):e0159724. doi: 10.1371/journal.pone.0159724 (PMC4957803; doi:10.1371/journal.pone.0159724)
Supplement: S2 Table — (XLSX) [file pone.0159724.s003.xlsx]

## Sheet: Table S2
Table S2. Genes decreased more than 2-fold in KO M1 vs. KO M0 macrophages
Name	Description	Fold Change KOM1 vs KOM0	p-value KOM1 vs. KOM0		Mean Class Expr KOM0	Mean Class Expr KOM1
1434798_at	ATPase, H+ transporting, lysosomal V0 subunit D2, Atp6v0d2	0.028	0.0268337		3632.96	101.52
1444176_at	ATPase, H+ transporting, lysosomal V0 subunit D2, Atp6v0d2	0.03	0.0206961		2455.72	72.47
1449153_at	matrix metallopeptidase 12, Mmp12	0.03	0.0192555		5294.82	159.71
1450920_at	cyclin B2, Ccnb2	0.047	0.00733353		438.23	20.59
1450430_at	mannose receptor, C type 1, Mrc1	0.05	0.000373646		3317.99	164.97
1424542_at	S100 calcium binding protein A4, S100a4	0.053	0.000913431		4656.79	247.25
1452954_at	ubiquitin-conjugating enzyme E2C, Ube2c	0.057	0.00239783		760.28	43.6
1424278_a_at	baculoviral IAP repeat-containing 5, Birc5	0.062	0.000678128		568.29	35.32
1417597_at	CD28 antigen, Cd28	0.063	0.0446634		424.64	26.89
1416076_at	cyclin B1, Ccnb1	0.072	0.00830528		225	16.25
1427329_a_at	immunoglobulin heavy chain 6 (heavy chain of IgM), Igh-6	0.078	0.00513294		394.84	30.74
1450781_at	high mobility group AT-hook 2, Hmga2	0.078	0.0103383		222.41	17.38
1448226_at	ribonucleotide reductase M2, Rrm2	0.079	0.012245		472.65	37.45
1417910_at	cyclin A2, Ccna2	0.082	0.00196477		615.16	50.6
1448627_s_at	PDZ binding kinase, Pbk	0.082	0.000932186		377.21	30.79
1452040_a_at	cell division cycle associated 3, Cdca3	0.082	0.00363553		566.47	46.48
1416805_at	family with sequence similarity 198, member B, Fam198b	0.083	0.0100771		458.03	37.88
1435123_at	EFR3 homolog B (S. cerevisiae), Efr3b	0.083	0.00838089		237.21	19.61
1417911_at	cyclin A2, Ccna2	0.084	0.000586484		923.59	77.58
1439377_x_at	cell division cycle 20 homolog (S. cerevisiae), Cdc20	0.087	0.00701063		338.16	29.57
1433543_at	anillin, actin binding protein, Anln	0.09	0.00131692		196.7	17.62
1448291_at	matrix metallopeptidase 9, Mmp9	0.09	0.0177917		1189.88	107.57
1431970_at	transmembrane 7 superfamily member 4, Tm7sf4	0.091	0.0379023		408.24	37.07
1448205_at	cyclin B1, Ccnb1	0.092	0.0092384		284.99	26.22
1415849_s_at	stathmin 1, Stmn1	0.093	0.0030167		3211.34	299.46
1427161_at	centromere protein F, Cenpf	0.096	0.00190775		236.87	22.75
1418281_at	RAD51 homolog (S. cerevisiae), Rad51	0.097	0.00131678		190.8	18.43
1434437_x_at	ribonucleotide reductase M2, Rrm2	0.097	0.002753		597.37	57.91
1419605_at	C-type lectin domain family 10, member A, Clec10a	0.098	0.0186382		421.75	41.47
1427682_a_at	early growth response 2, Egr2	0.098	0.00280223		134.52	13.13
1416326_at	cysteine-rich protein 1 (intestinal), Crip1	0.099	0.0223059		7651.52	756.21
1419153_at	RIKEN cDNA 2810417H13 gene, 2810417H13Rik	0.1	0.00923292		849.76	84.64
1450884_at	CD36 antigen, Cd36	0.109	0.0103739		406.13	44.35
1448566_at	solute carrier family 40 (iron-regulated transporter), member 1, Slc40a1	0.11	0.0255259		2101.57	231.76
1420699_at	C-type lectin domain family 7, member a, Clec7a	0.111	0.0228409		5112.72	565.5
1453152_at	MAM domain containing 2, Mamdc2	0.111	0.0119409		131.37	14.62
1417420_at	cyclin D1, Ccnd1	0.113	0.00113854		1309.19	147.86
1422804_at	serine (or cysteine) peptidase inhibitor, clade B, member 6b, Serpinb6b	0.113	0.00207732		132.99	15.03
1452913_at	Purkinje cell protein 4-like 1, Pcp4l1	0.116	0.00158099		320.5	37.21
1416309_at	nucleolar and spindle associated protein 1, Nusap1	0.119	0.00522608		321.6	38.38
1418509_at	carbonyl reductase 2, Cbr2	0.119	0.00691946		979.46	116.17
1449207_a_at	kinesin family member 20A, Kif20a	0.121	0.000231077		134.09	16.24
1421546_a_at	Rac GTPase-activating protein 1, Racgap1	0.123	0.00946503		131.6	16.24
1427351_s_at	immunoglobulin heavy chain 6 (heavy chain of IgM), Igh-6	0.124	0.014218		690.95	85.55
1455544_at	zinc finger, RAN-binding domain containing 3, Zranb3	0.125	0.0139726		538.56	67.58
1427683_at	early growth response 2, Egr2	0.126	0.0236474		259.59	32.59
1452242_at	centrosomal protein 55, Cep55	0.127	0.00804023		167.5	21.22
1448899_s_at	RAD51 associated protein 1, Rad51ap1	0.128	0.00231137		123.35	15.75
1450842_a_at	centromere protein A, Cenpa	0.129	0.00478928		558.97	72.26
1416034_at	CD24a antigen, Cd24a	0.132	0.00141258		121.66	16.1
1426622_a_at	glutaminyl-peptide cyclotransferase (glutaminyl cyclase), Qpct	0.132	0.00203622		309.43	40.73
1420715_a_at	peroxisome proliferator activated receptor gamma, Pparg	0.135	0.000359732		284.41	38.53
1458019_at		0.136	0.00236728		123.77	16.8
1417061_at	solute carrier family 40 (iron-regulated transporter), member 1, Slc40a1	0.138	0.030239		1879.63	258.98
1454694_a_at	topoisomerase (DNA) II alpha, Top2a	0.139	0.00294679		630.36	87.4
1420398_at	regulator of G-protein signaling 18, Rgs18	0.14	0.0171256		582.08	81.25
1448182_a_at	CD24a antigen, Cd24a	0.14	0.00409016		136.48	19.08
1422438_at	epoxide hydrolase 1, microsomal, Ephx1	0.142	0.0339985		766.06	109.06
1421792_s_at	triggering receptor expressed on myeloid cells 2, Trem2	0.143	0.00956791		6293.94	900.88
1417419_at	cyclin D1, Ccnd1	0.144	0.0441631		740.29	106.76
1448113_at	stathmin 1, Stmn1	0.145	0.0102155		203.16	29.51
1416120_at	ribonucleotide reductase M2, Rrm2	0.146	0.000620986		590.07	86.4
1419943_s_at	cyclin B1, Ccnb1	0.146	0.00236896		330.76	48.35
1422851_at	high mobility group AT-hook 2, Hmga2	0.146	0.00840901		281.67	41.26
1416298_at	matrix metallopeptidase 9, Mmp9	0.148	0.0254217		450.54	66.61
1416529_at	epithelial membrane protein 1, Emp1	0.149	0.0136797		1480.34	220.06
1417938_at	RAD51 associated protein 1, Rad51ap1	0.149	0.0178828		106.58	15.88
1448698_at	cyclin D1, Ccnd1	0.15	0.00371235		1997.42	299.12
1448891_at	Fc receptor-like S, scavenger receptor, Fcrls	0.15	0.00819396		4583.08	686.64
1422430_at	fidgetin-like 1, Fignl1	0.151	0.000832547		326.99	49.28
1450780_s_at	high mobility group AT-hook 2, Hmga2	0.152	0.00411301		365.74	55.42
1423774_a_at	protein regulator of cytokinesis 1, Prc1	0.155	0.0114517		162.95	25.27
1418872_at	ATP-binding cassette, sub-family B (MDR/TAP), member 1B, Abcb1b	0.156	0.0130246		159.67	24.93
1419152_at	RIKEN cDNA 2810417H13 gene, 2810417H13Rik	0.156	0.00645157		119.82	18.69
1416258_at	thymidine kinase 1, Tk1	0.158	0.000303088		566.16	89.62
1426817_at	antigen identified by monoclonal antibody Ki 67, Mki67	0.159	0.00644142		613.37	97.7
1416066_at	CD9 antigen, Cd9	0.162	0.012216		4742.09	766.07
1415810_at	ubiquitin-like, containing PHD and RING finger domains, 1, Uhrf1	0.163	0.00240518		297.25	48.41
1438030_at	RAS, guanyl releasing protein 3, Rasgrp3	0.163	0.0369902		97.92	15.92
1429637_at	family with sequence similarity 198, member B, Fam198b	0.166	0.0134333		58.09	9.64
1423809_at	transcription factor 19, Tcf19	0.171	0.00027326		204.69	34.98
1435306_a_at	kinesin family member 11, Kif11	0.172	0.023074		86.11	14.85
1432329_a_at	megakaryocyte-associated tyrosine kinase, Matk	0.173	0.0434743		587.95	101.63
1435386_at	Von Willebrand factor homolog, Vwf	0.174	0.00133756		234.57	40.89
1451358_a_at	Rac GTPase-activating protein 1, Racgap1	0.174	0.000253267		297.87	51.7
1436808_x_at	minichromosome maintenance deficient 5, cell division cycle 46 (S. cerevisiae), Mcm5	0.175	0.000482261		857.1	150.14
1416558_at	maternal embryonic leucine zipper kinase, Melk	0.176	0.00285568		141.89	24.99
1435575_at	kinetochore associated 1, Kntc1	0.176	0.00243804		126.03	22.17
1430811_a_at	NUF2, NDC80 kinetochore complex component, homolog (S. cerevisiae), Nuf2	0.177	0.0111175		163.02	28.88
1429171_a_at	non-SMC condensin I complex, subunit G, Ncapg	0.178	0.0111005		78.41	13.98
1430604_a_at	disabled homolog 2 (Drosophila), Dab2	0.179	0.0366272		1174.51	210.57
1435389_at	RALBP1 associated Eps domain containing protein 2, Reps2	0.179	0.00525759		337	60.23
1415811_at	ubiquitin-like, containing PHD and RING finger domains, 1, Uhrf1	0.18	0.0115943		199.21	35.95
1416299_at	Shc SH2-domain binding protein 1, Shcbp1	0.18	0.0138128		172.81	31.19
1425227_a_at	ATPase, H+ transporting, lysosomal V0 subunit A1, Atp6v0a1	0.181	0.0190715		447.04	80.84
1420924_at	tissue inhibitor of metalloproteinase 2, Timp2	0.186	0.0226424		711.85	132.66
1450883_a_at	CD36 antigen, Cd36	0.186	0.01195		6328.19	1180.17
1452291_at	ArfGAP with RhoGAP domain, ankyrin repeat and PH domain 2, Arap2	0.186	0.00185209		199.32	36.98
1422535_at	cyclin E2, Ccne2	0.187	0.00162481		51.07	9.57
1432198_at		0.188	0.0153301		231.69	43.5
1422814_at	asp (abnormal spindle)-like, microcephaly associated (Drosophila), Aspm	0.189	0.00317435		107.64	20.36
1452314_at	kinesin family member 11, Kif11	0.189	0.000569306		129.24	24.41
1424046_at	budding uninhibited by benzimidazoles 1 homolog (S. cerevisiae), Bub1	0.191	0.00774694		193.8	37.1
1424128_x_at	aurora kinase B, Aurkb	0.193	0.000577735		188.02	36.25
1415945_at	minichromosome maintenance deficient 5, cell division cycle 46 (S. cerevisiae), Mcm5	0.194	0.0091074		415.36	80.77
1437687_x_at	FK506 binding protein 9, Fkbp9	0.194	0.0416779		187.41	36.43
1440156_s_at	TOX high mobility group box family member 2, Tox2	0.195	0.0167679		230.25	44.84
1453107_s_at	RIKEN cDNA 4933413G19 gene /// forkhead box M1 /// phosphatidylethanolamine binding protein 1, 4933413G19Rik /// Foxm1 /// Pebp1	0.195	0.0130718		99.59	19.45
1423166_at	CD36 antigen, Cd36	0.196	0.0198753		7386.81	1444.52
1416111_at	CD83 antigen, Cd83	0.197	0.0194525		546.26	107.85
1437580_s_at	NIMA (never in mitosis gene a)-related expressed kinase 2, Nek2	0.197	0.00127713		47.94	9.43
1449249_at	protocadherin 7, Pcdh7	0.197	0.0167457		135.85	26.8
1427005_at	polo-like kinase 2 (Drosophila), Plk2	0.198	0.00126904		1320.22	261.58
1449856_at	regulator of G-protein signaling 18, Rgs18	0.198	0.00293105		608.22	120.49
1460239_at	tetraspanin 13, Tspan13	0.2	0.0089183		277.77	55.48
1448576_at	interleukin 7 receptor, Il7r	0.201	0.0208		779.62	156.49
1416664_at	cell division cycle 20 homolog (S. cerevisiae), Cdc20	0.204	0.0108291		349.06	71.12
1419513_a_at	ect2 oncogene, Ect2	0.205	0.0370563		67.04	13.74
1440284_at		0.206	0.0363058		242.85	49.94
1415855_at	kit ligand, Kitl	0.207	0.00105269		52.88	10.95
1445626_at		0.207	0.000344721		735.69	152.1
1432344_a_at	amyloid beta (A4) precursor-like protein 2, Aplp2	0.21	0.00520382		1575.19	330.12
1418264_at	centromere protein K, Cenpk	0.211	0.000540294		86.96	18.31
1437466_at	activated leukocyte cell adhesion molecule, Alcam	0.211	0.0198199		382.34	80.51
1438320_s_at	minichromosome maintenance deficient 7 (S. cerevisiae), Mcm7	0.211	0.00261581		1339.73	282.35
1418497_at	fibroblast growth factor 13, Fgf13	0.217	0.002178		83.55	18.14
1450085_at	angiopoietin-like 2, Angptl2	0.217	0.0156406		206.85	44.96
1424118_a_at	SPC25, NDC80 kinetochore complex component, homolog (S. cerevisiae), Spc25	0.218	1.42046e-05		281.85	61.54
1421375_a_at	S100 calcium binding protein A6 (calcyclin), S100a6	0.219	0.0173599		3968.31	867.92
1435005_at	centromere protein E, Cenpe	0.219	0.0023027		159.73	35.01
1433670_at	epithelial membrane protein 2, Emp2	0.221	0.00603437		502.02	110.77
1433893_s_at	sperm associated antigen 5, Spag5	0.221	0.0244357		41.22	9.12
1460431_at	glucosaminyl (N-acetyl) transferase 1, core 2, Gcnt1	0.221	0.0147686		239.35	52.91
1452353_at	G protein-coupled receptor 155, Gpr155	0.222	0.00365413		178.36	39.57
1437187_at	E2F transcription factor 7, E2f7	0.223	0.00483422		77.46	17.25
1420928_at	beta galactoside alpha 2,6 sialyltransferase 1, St6gal1	0.225	0.0353777		1297.4	292.51
1424511_at	aurora kinase A, Aurka	0.226	0.00459546		186.97	42.29
1421002_at	angiopoietin-like 2, Angptl2	0.227	0.0119756		373.97	84.85
1420477_at	nucleosome assembly protein 1-like 1, Nap1l1	0.228	0.0221356		344.04	78.39
1424826_s_at	metastasis suppressor 1, Mtss1	0.228	0.00566871		1009.3	229.99
1448191_at	polo-like kinase 1 (Drosophila), Plk1	0.231	0.00917015		256.44	59.25
1455990_at	kinesin family member 23, Kif23	0.233	0.00562761		276.08	64.33
1437611_x_at	kinesin family member 2C, Kif2c	0.234	0.00584387		147.48	34.47
1423805_at	disabled homolog 2 (Drosophila), Dab2	0.235	0.0215292		1546.58	363.61
1457198_at	neuropilin 1, Nrp1	0.235	0.000467989		531.35	124.82
1427345_a_at	sulfotransferase family 1A, phenol-preferring, member 1, Sult1a1	0.237	0.0103071		260.15	61.53
1430574_at	cyclin-dependent kinase inhibitor 3, Cdkn3	0.239	0.000502808		123.72	29.51
1448575_at	interleukin 7 receptor, Il7r	0.239	0.0377965		1845.99	440.5
1439695_a_at	kinesin family member 20B, Kif20b	0.24	0.00208958		107.57	25.84
1440847_at	metastasis suppressor 1, Mtss1	0.24	0.00830705		263.3	63.24
1452073_at	family with sequence similarity 64, member A, Fam64a	0.241	0.0192765		119.03	28.67
1416030_a_at	minichromosome maintenance deficient 7 (S. cerevisiae), Mcm7	0.243	0.00321433		483.06	117.37
1416155_at	high mobility group box 3, Hmgb3	0.243	0.00315723		258.58	62.87
1428574_a_at	chimerin (chimaerin) 2, Chn2	0.243	0.0468849		40.73	9.89
1431056_a_at	lipoprotein lipase, Lpl	0.243	0.015932		10732.6	2609.87
1451867_x_at	Rho GTPase activating protein 6, Arhgap6	0.243	0.026246		212.19	51.65
1420911_a_at	milk fat globule-EGF factor 8 protein, Mfge8	0.247	0.00241329		1391.82	343.99
1460650_at	ATPase, H+ transporting, lysosomal V0 subunit A1, Atp6v0a1	0.247	0.00270753		481.97	118.85
1436723_at	centromere protein I, Cenpi	0.25	0.00101023		119.13	29.84
1448943_at	neuropilin 1, Nrp1	0.251	0.0326077		2687.97	674.16
1415936_at	breast cancer anti-estrogen resistance 3, Bcar3	0.252	0.01223		299.3	75.44
1419519_at	insulin-like growth factor 1, Igf1	0.252	0.0169479		1892.52	476.11
1448127_at	ribonucleotide reductase M1, Rrm1	0.252	0.00411196		607.25	152.88
1452912_at	defective in sister chromatid cohesion 1 homolog (S. cerevisiae), Dscc1	0.252	0.0135271		35.69	8.99
1434036_at	metastasis suppressor 1, Mtss1	0.253	0.00321049		2019.1	510.23
1439269_x_at	minichromosome maintenance deficient 7 (S. cerevisiae), Mcm7	0.255	0.0033284		204.94	52.32
1448635_at	structural maintenance of chromosomes 2, Smc2	0.255	0.0091143		456.79	116.37
1418084_at	neuropilin 1, Nrp1	0.256	0.00232112		2819.75	721.65
1419186_a_at	ST8 alpha-N-acetyl-neuraminide alpha-2,8-sialyltransferase 4, St8sia4	0.256	0.0270855		874.57	224.06
1450906_at	plexin C1, Plxnc1	0.256	4.99432e-05		175.3	44.82
1452305_s_at	centromere protein N, Cenpn	0.256	0.000502108		145.1	37.09
1420081_s_at	DNA segment, Chr 2, ERATO Doi 750, expressed, D2Ertd750e	0.257	0.00144028		178.98	46.03
1423064_at	DNA methyltransferase 3A, Dnmt3a	0.257	0.0410254		889.78	229.06
1432361_a_at	centromere protein P, Cenpp	0.257	0.0327459		40.62	10.44
1424942_a_at	myelocytomatosis oncogene, Myc	0.258	0.00230987		244.86	63.22
1417399_at	growth arrest specific 6, Gas6	0.259	0.0276801		2435.3	631.85
1417601_at	regulator of G-protein signaling 1, Rgs1	0.26	0.0310903		1256.31	326.67
1455090_at	angiopoietin-like 2, Angptl2	0.261	0.0175509		810.21	211.8
1425108_a_at	small cell adhesion glycoprotein, Smagp	0.263	0.00201977		382.49	100.67
1450157_a_at	hyaluronan mediated motility receptor (RHAMM), Hmmr	0.263	0.0185752		72.77	19.14
1447830_s_at	regulator of G-protein signaling 2, Rgs2	0.265	0.0183605		1307.19	346.21
1424832_at	CD300 molecule-like family member d, Cd300ld	0.267	0.0158662		1955.24	521.74
1429499_at	F-box protein 5, Fbxo5	0.267	0.00352739		199.45	53.26
1430097_at	RIKEN cDNA 8430436C05 gene, 8430436C05Rik	0.268	0.00116605		72.85	19.55
1434413_at	insulin-like growth factor 1, Igf1	0.268	0.00440175		3293.13	881.74
1453683_a_at	centrosomal protein 55, Cep55	0.268	0.0163105		48.32	12.94
1416156_at	vinculin, Vcl	0.269	0.0144619		476.3	128.13
1416832_at	solute carrier family 39 (metal ion transporter), member 8, Slc39a8	0.269	0.0128507		71.78	19.32
1425753_a_at	uracil DNA glycosylase, Ung	0.269	0.0154944		120.76	32.54
1428834_at	dual specificity phosphatase 4, Dusp4	0.27	0.0143593		152.74	41.2
1416757_at	Zwilch, kinetochore associated, homolog (Drosophila), Zwilch	0.272	0.015455		162.77	44.26
1434557_at	huntingtin interacting protein 1, Hip1	0.272	0.00926982		743.71	202.09
1437401_at	insulin-like growth factor 1, Igf1	0.272	0.000213492		2756.65	748.94
1429693_at	disabled homolog 2 (Drosophila), Dab2	0.273	0.0215274		403.5	110.06
1447363_s_at	budding uninhibited by benzimidazoles 1 homolog, beta (S. cerevisiae), Bub1b	0.274	0.0120321		133.7	36.66
1437488_at	solute carrier family 9 (sodium/hydrogen exchanger), member 9, Slc9a9	0.275	0.00713614		136.07	37.48
1448605_at	ras homolog gene family, member C, Rhoc	0.275	0.00464715		549.28	151.14
1416802_a_at	cell division cycle associated 5, Cdca5	0.276	0.00462039		357.56	98.75
1457999_at	family with sequence similarity 82, member B, Fam82b	0.278	0.0105133		273.63	75.95
1416251_at	minichromosome maintenance deficient 6 (MIS5 homolog, S. pombe) (S. cerevisiae), Mcm6	0.279	0.00220076		1845.46	515.51
1429660_s_at	structural maintenance of chromosomes 2, Smc2	0.279	0.00263454		80.29	22.44
1451064_a_at	phosphoserine aminotransferase 1, Psat1	0.28	0.0332016		669.02	187.46
1454677_at	tissue inhibitor of metalloproteinase 2, Timp2	0.281	0.0185237		2304.03	646.49
1417491_at	cathepsin B, Ctsb	0.283	0.00264123		6304.14	1781.89
1424629_at	breast cancer 1, Brca1	0.283	0.0139599		132.07	37.37
1422957_at	chemokine (C-C motif) receptor 3, Ccr3	0.284	0.010603		68.83	19.57
1437251_at	cell division cycle associated 2, Cdca2	0.284	0.0379857		107.06	30.41
1419247_at	regulator of G-protein signaling 2, Rgs2	0.285	0.0387387		2215.82	632.06
1419833_s_at	ArfGAP with RhoGAP domain, ankyrin repeat and PH domain 3, Arap3	0.285	0.0109758		289.5	82.53
1426015_s_at	aspartate-beta-hydroxylase, Asph	0.285	0.0117494		415.86	118.51
1449171_at	Ttk protein kinase, Ttk	0.285	0.0142205		109.57	31.25
1420160_s_at	myosin IE, Myo1e	0.287	0.0021244		132.44	37.95
1431087_at	SPC24, NDC80 kinetochore complex component, homolog (S. cerevisiae), Spc24	0.287	0.0206937		145.68	41.76
1428074_at	transmembrane protein 158, Tmem158	0.288	0.0147961		93.7	26.99
1434695_at	denticleless homolog (Drosophila), Dtl	0.288	0.0180785		108.9	31.41
1448944_at	neuropilin 1, Nrp1	0.289	0.000761266		1664.97	480.9
1452315_at	kinesin family member 11, Kif11	0.289	0.016654		87.61	25.32
1423140_at	lysosomal acid lipase A, Lipa	0.29	0.00277886		1953.09	567.3
1438852_x_at	minichromosome maintenance deficient 6 (MIS5 homolog, S. pombe) (S. cerevisiae), Mcm6	0.29	0.0414556		416.11	120.69
1445522_at	ATPase, class I, type 8B, member 4, Atp8b4	0.29	0.005456		168.61	48.97
1452299_at	WW domain containing E3 ubiquitin protein ligase 1, Wwp1	0.29	0.000965979		1610.42	466.66
1452881_at	GINS complex subunit 2 (Psf2 homolog), Gins2	0.291	0.000422871		291.93	84.88
1453748_a_at	kinesin family member 23, Kif23	0.293	0.00817247		33.76	9.88
1446417_at		0.294	0.00560856		121.08	35.6
1451246_s_at	aurora kinase B, Aurkb	0.294	0.0117793		47.76	14.04
1423847_at	non-SMC condensin I complex, subunit D2, Ncapd2	0.295	0.0180977		214.58	63.34
1428481_s_at	cell division cycle associated 8, Cdca8	0.295	0.0059561		511.07	150.73
1417541_at	helicase, lymphoid specific, Hells	0.296	0.0137931		82.67	24.47
1421492_at	hematopoietic prostaglandin D synthase, Hpgds	0.296	0.0113747		1118.89	331.06
1423049_a_at	tropomyosin 1, alpha, Tpm1	0.296	0.00296499		983.16	290.66
1443086_at	activated leukocyte cell adhesion molecule, Alcam	0.296	0.0474488		104.28	30.91
1452014_a_at	insulin-like growth factor 1, Igf1	0.297	0.000768626		6643.14	1976.15
1448314_at	cyclin-dependent kinase 1, Cdk1	0.298	0.00157184		841.19	250.98
1427098_at	WW domain containing E3 ubiquitin protein ligase 1, Wwp1	0.3	0.00272611		697.34	209.36
1434789_at	DEP domain containing 1B, Depdc1b	0.3	0.00152312		85.17	25.51
1419270_a_at	deoxyuridine triphosphatase, Dut	0.301	0.0134672		188.18	56.67
1422460_at	MAD2 mitotic arrest deficient-like 1 (yeast), Mad2l1	0.301	0.00175689		306.69	92.31
1425273_s_at	epithelial membrane protein 2, Emp2	0.301	0.0111136		245.06	73.78
1448300_at	microsomal glutathione S-transferase 3, Mgst3	0.302	0.00946085		1063.93	321.5
1450058_at	aspartate-beta-hydroxylase, Asph	0.302	0.00980483		800.37	241.77
1452458_s_at	peptidylprolyl isomerase (cyclophilin) like 5, Ppil5	0.302	0.0289782		57.37	17.35
1416961_at	budding uninhibited by benzimidazoles 1 homolog, beta (S. cerevisiae), Bub1b	0.304	0.0131118		228.17	69.39
1425815_a_at	hyaluronan mediated motility receptor (RHAMM), Hmmr	0.304	0.00740149		157.12	47.78
1437442_at	Protocadherin 7, Pcdh7	0.304	0.0322194		63.56	19.35
1437467_at	activated leukocyte cell adhesion molecule, Alcam	0.305	0.0292092		448.54	136.71
1448777_at	minichromosome maintenance deficient 2 mitotin (S. cerevisiae), Mcm2	0.305	0.00270504		402.1	122.69
1454011_a_at	replication protein A2, Rpa2	0.305	0.013231		266.52	81.19
1423756_s_at	insulin-like growth factor binding protein 4, Igfbp4	0.306	0.00281604		1669.18	510.88
1449699_s_at	RIKEN cDNA C330027C09 gene, C330027C09Rik	0.306	0.00247779		35.29	10.81
1433719_at	solute carrier family 9 (sodium/hydrogen exchanger), member 9, Slc9a9	0.308	0.00114755		784.81	241.98
1457424_at	eyes absent 1 homolog (Drosophila), Eya1	0.308	0.00288105		177.12	54.52
1421098_at	signal transducing adaptor family member 1, Stap1	0.31	0.0141976		1606.59	498.4
1440355_at	potassium channel tetramerisation domain containing 12b, Kctd12b	0.31	0.0378802		172.47	53.41
1442675_at		0.311	0.000235752		57.75	17.95
1443434_s_at	plexin C1, Plxnc1	0.311	0.0172743		145.61	45.25
1457579_at	DNA segment, Chr 11, ERATO Doi 717, expressed, D11Ertd717e	0.311	0.00481576		148.76	46.32
1417023_a_at	fatty acid binding protein 4, adipocyte, Fabp4	0.312	0.0110917		1633.43	510.01
1425272_at	epithelial membrane protein 2, Emp2	0.312	0.00718503		150.05	46.89
1426604_at	ribonuclease L (2', 5'-oligoisoadenylate synthetase-dependent), Rnasel	0.312	0.00576882		735.23	229.17
1456280_at	claspin homolog (Xenopus laevis), Clspn	0.312	0.036126		173.54	54.14
1419248_at	regulator of G-protein signaling 2, Rgs2	0.313	0.00274055		1324.69	414.86
1424991_s_at	thymidylate synthase /// thymidylate synthase, pseudogene, Tyms /// Tyms-ps	0.313	0.0133178		172.31	53.89
1433662_s_at	tissue inhibitor of metalloproteinase 2, Timp2	0.314	0.0485146		1860.73	584.68
1421424_a_at	alanyl (membrane) aminopeptidase, Anpep	0.315	0.0130069		1587.51	500
1418489_a_at	calcitonin receptor-like, Calcrl	0.316	0.00225929		166.72	52.71
1421992_a_at	insulin-like growth factor binding protein 4, Igfbp4	0.316	0.0101378		673	212.68
1423213_at	plexin C1, Plxnc1	0.316	0.00851043		1048.55	331.73
1433751_at	solute carrier family 39 (zinc transporter), member 10, Slc39a10	0.317	0.00240814		591.03	187.19
1415878_at	ribonucleotide reductase M1, Rrm1	0.318	0.000440229		721.57	229.13
1425934_a_at	UDP-Gal:betaGlcNAc beta 1,4-galactosyltransferase, polypeptide 4, B4galt4	0.318	0.00959836		86.86	27.65
1443729_at	metastasis suppressor 1, Mtss1	0.318	0.00711587		147.02	46.79
1449151_at	cyclin-dependent kinase 18, Cdk18	0.318	0.0168922		1933.48	615.77
1423141_at	lysosomal acid lipase A, Lipa	0.319	0.0134005		2347.52	749.47
1416498_at	peptidylprolyl isomerase C, Ppic	0.32	0.0413844		102.34	32.71
1420159_at	myosin IE, Myo1e	0.32	0.00085288		280.86	89.93
1422513_at	cyclin F, Ccnf	0.32	0.00244488		193.15	61.78
1428480_at	cell division cycle associated 8, Cdca8	0.32	0.00337689		219.66	70.27
1438068_at		0.322	0.00927538		20.14	6.49
1423775_s_at	protein regulator of cytokinesis 1, Prc1	0.323	0.00513608		468.93	151.37
1435338_at	cyclin-dependent kinase 6, Cdk6	0.324	0.0177985		1666.86	540.35
1423214_at	plexin C1, Plxnc1	0.325	0.0167951		268.8	87.25
1449538_a_at	glucosaminyl (N-acetyl) transferase 1, core 2, Gcnt1	0.325	0.00197569		177.1	57.62
1438882_at		0.326	0.000275937		178.08	58.04
1448650_a_at	polymerase (DNA directed), epsilon, Pole	0.326	0.00790694		148.9	48.49
1448894_at	aldo-keto reductase family 1, member B8, Akr1b8	0.326	0.00120613		792.73	258.46
1416641_at	ligase I, DNA, ATP-dependent, Lig1	0.327	0.0131054		717.74	234.38
1420250_at		0.327	0.0430521		121.56	39.71
1437716_x_at	kinesin family member 22, Kif22	0.328	0.0112079		639.87	209.67
1417019_a_at	cell division cycle 6 homolog (S. cerevisiae), Cdc6	0.329	0.00921472		66.21	21.8
1423721_at	tropomyosin 1, alpha, Tpm1	0.331	0.000291806		836.27	277.19
1426473_at	DnaJ (Hsp40) homolog, subfamily C, member 9, Dnajc9	0.331	0.0123682		429.87	142.47
1436707_x_at	non-SMC condensin I complex, subunit H, Ncaph	0.331	0.0280912		398.75	132.06
1418643_at	tetraspanin 13, Tspan13	0.332	0.0244777		335.84	111.64
1422016_a_at	centromere protein H, Cenph	0.332	0.0270724		35.66	11.85
1439041_at	solute carrier family 39 (zinc transporter), member 10, Slc39a10	0.332	0.0155494		235.7	78.25
1444024_at	excision repair cross-complementing rodent repair deficiency complementation group 6 - like, Ercc6l	0.332	0.00975265		36.45	12.09
1420479_a_at	nucleosome assembly protein 1-like 1, Nap1l1	0.334	0.0234367		1200.55	401.45
1449078_at	ST3 beta-galactoside alpha-2,3-sialyltransferase 6, St3gal6	0.334	0.0338789		38.82	12.98
1426041_a_at	FYVE, RhoGEF and PH domain containing 4, Fgd4	0.335	0.0293963		137.23	45.95
1428104_at	TPX2, microtubule-associated protein homolog (Xenopus laevis), Tpx2	0.335	0.00914754		199.62	66.9
1416868_at	cyclin-dependent kinase inhibitor 2C (p18, inhibits CDK4), Cdkn2c	0.336	0.00389565		1058.93	355.42
1428573_at	chimerin (chimaerin) 2, Chn2	0.336	0.00317833		41.43	13.92
1453550_a_at	fatty acyl CoA reductase 1, Far1	0.336	0.0210472		103.71	34.88
1417457_at	CDC28 protein kinase regulatory subunit 2, Cks2	0.337	0.0368119		425.29	143.38
1428069_at	cell division cycle associated 7, Cdca7	0.337	0.00438143		114.08	38.46
1423796_at	splicing factor proline/glutamine rich (polypyrimidine tract binding protein associated), Sfpq	0.338	2.41725e-05		107.54	36.31
1429364_at	RIKEN cDNA 4930579G24 gene, 4930579G24Rik	0.338	0.0219121		104.07	35.19
1429172_a_at	non-SMC condensin I complex, subunit G, Ncapg	0.339	0.0115712		75.74	25.65
1420927_at	beta galactoside alpha 2,6 sialyltransferase 1, St6gal1	0.34	0.0138171		175.09	59.52
1420959_at	aspartate-beta-hydroxylase, Asph	0.341	0.00207719		1681.1	572.6
1425037_at	FYVE, RhoGEF and PH domain containing 4, Fgd4	0.341	0.00318406		339.52	115.92
1457434_s_at	protein tyrosine phosphatase-like (proline instead of catalytic arginine), member a, Ptpla	0.342	0.0352444		159.79	54.69
1449061_a_at	DNA primase, p49 subunit, Prim1	0.343	0.0042409		120.56	41.34
1416698_a_at	CDC28 protein kinase 1b, Cks1b	0.345	0.0247018		764.31	263.48
1419123_a_at	platelet-derived growth factor, C polypeptide, Pdgfc	0.345	0.0444139		57.94	20.01
1419814_s_at	S100 calcium binding protein A1, S100a1	0.345	0.0132783		1422.72	491.14
1435284_at	reticulon 4, Rtn4	0.345	0.0395737		355.1	122.46
1446505_at	CD84 antigen, Cd84	0.345	0.00407132		295.37	101.89
1437405_a_at	insulin-like growth factor binding protein 4, Igfbp4	0.346	0.00346241		2692.84	931.9
1419397_at	polymerase (DNA directed), alpha 1, Pola1	0.347	0.0106156		133.62	46.35
1437370_at	shugoshin-like 2 (S. pombe), Sgol2	0.347	0.00644949		77.59	26.91
1428450_at	RIKEN cDNA 2610034B18 gene, 2610034B18Rik	0.348	0.0306868		169.16	58.91
1436265_at	predicted gene 10419, Gm10419	0.348	0.00293601		37.67	13.12
1433906_at	clavesin 1, Clvs1	0.35	0.0423205		108.12	37.85
1418203_at	phorbol-12-myristate-13-acetate-induced protein 1, Pmaip1	0.351	0.0368211		190.48	66.81
1418252_at	peptidyl arginine deiminase, type II, Padi2	0.351	0.0336426		186.93	65.64
1422462_at	ubiquitin-conjugating enzyme E2T (putative), Ube2t	0.351	0.00510687		100.6	35.28
1450407_a_at	acidic (leucine-rich) nuclear phosphoprotein 32 family, member A, Anp32a	0.352	0.00283541		1031.7	363.26
1416031_s_at	minichromosome maintenance deficient 7 (S. cerevisiae), Mcm7	0.353	0.00486865		507.23	179.11
1418243_at	ficolin A, Fcna	0.353	0.00987276		305.13	107.84
1426370_at	fatty acyl CoA reductase 1, Far1	0.354	0.0161308		256.24	90.71
1437406_x_at	insulin-like growth factor binding protein 4, Igfbp4	0.354	0.00650208		1717.13	608.21
1443628_at		0.354	0.0037171		84.09	29.78
1417821_at	DNA segment, Chr 17, human D6S56E 5, D17H6S56E-5	0.355	0.0259606		1133.73	402.46
1450905_at	plexin C1, Plxnc1	0.355	0.0140948		1195.65	424.63
1457589_at	FAT tumor suppressor homolog 3 (Drosophila), Fat3	0.355	0.0405799		296.78	105.39
1451077_at	60S ribosomal protein L5-like, LOC100503670	0.356	0.00414387		119.95	42.76
1417704_a_at	Rho GTPase activating protein 6, Arhgap6	0.358	0.0109058		22.05	7.89
1427097_at	WW domain containing E3 ubiquitin protein ligase 1, Wwp1	0.358	0.000405075		1883.95	673.66
1460287_at	tissue inhibitor of metalloproteinase 2, Timp2	0.358	0.021673		3717.36	1331.42
1418369_at	DNA primase, p49 subunit, Prim1	0.36	0.00123539		250.68	90.29
1426301_at	activated leukocyte cell adhesion molecule, Alcam	0.361	0.0333234		289.05	104.49
1436847_s_at	cell division cycle associated 8, Cdca8	0.361	0.0119891		984.04	355.26
1437760_at	UDP-N-acetyl-alpha-D-galactosamine:polypeptide N-acetylgalactosaminyltransferase 12, Galnt12	0.361	0.00774286		212.55	76.64
1425745_a_at	transforming, acidic coiled-coil containing protein 2, Tacc2	0.362	0.0431438		181.87	65.87
1427707_a_at	Scl/Tal1 interrupting locus, Stil	0.362	0.00602054		40.11	14.51
1436520_at	AHNAK nucleoprotein 2, Ahnak2	0.362	0.0364479		1281.08	463.68
1450692_at	kinesin family member 4, Kif4	0.362	0.0375776		77.92	28.23
1417435_at	like-glycosyltransferase, Large	0.364	0.00763191		313.47	114.13
1451128_s_at	kinesin family member 22, Kif22	0.364	0.00706464		74.78	27.21
1455730_at	discs, large (Drosophila) homolog-associated protein 5, Dlgap5	0.364	0.00564947		153.24	55.75
1418057_at	T-cell lymphoma invasion and metastasis 1, Tiam1	0.365	0.0257292		163.24	59.57
1436317_at	hypothetical protein LOC100504348, LOC100504348	0.366	0.0106012		260.43	95.43
1421731_a_at	flap structure specific endonuclease 1, Fen1	0.367	0.00844511		628.62	230.87
1450006_at	predicted gene 6768 /// nuclear receptor coactivator 4, Gm6768 /// Ncoa4	0.367	0.00201891		2879.9	1056.76
1450700_at	CDC42 effector protein (Rho GTPase binding) 3, Cdc42ep3	0.367	0.0119841		119.42	43.82
1454699_at	sestrin 1, Sesn1	0.367	0.0162469		833.87	305.77
1415950_a_at	phosphatidylethanolamine binding protein 1, Pebp1	0.369	0.00774832		3369.94	1244.31
1421889_a_at	amyloid beta (A4) precursor-like protein 2, Aplp2	0.369	0.0270998		2161.19	796.72
1449481_at	solute carrier family 25 (mitochondrial carrier, adenine nucleotide translocator), member 13, Slc25a13	0.369	0.00343085		275.81	101.86
1418026_at	exonuclease 1, Exo1	0.37	0.012838		62.5	23.1
1433408_a_at	minichromosome maintenance deficient 10 (S. cerevisiae), Mcm10	0.37	0.00182961		214.85	79.6
1417421_at	S100 calcium binding protein A1, S100a1	0.371	0.0167258		721.06	267.42
1417376_a_at	cell adhesion molecule 1, Cadm1	0.372	0.0175981		226.05	84.13
1424265_at	N-acetylneuraminate pyruvate lyase, Npl	0.373	0.00684985		354.06	131.91
1435029_at	RIKEN cDNA B230120H23 gene, B230120H23Rik	0.373	0.033785		269.12	100.27
1437245_at	transmembrane protein 154, Tmem154	0.373	0.0138484		41.95	15.65
1448441_at	CDC28 protein kinase 1b, Cks1b	0.373	0.00278905		352.22	131.21
1417458_s_at	CDC28 protein kinase regulatory subunit 2, Cks2	0.375	0.0113815		307.65	115.45
1418206_at	stromal cell-derived factor 2-like 1, Sdf2l1	0.375	0.046181		2056.52	771.44
1459546_s_at	ectonucleotide pyrophosphatase/phosphodiesterase 1, Enpp1	0.375	0.0200112		160.53	60.27
1417219_s_at	thymosin, beta 10, Tmsb10	0.376	0.00417973		2174.8	817.93
1421685_at	C-type lectin domain family 4, member b1, Clec4b1	0.376	0.0133365		333.07	125.25
1425811_a_at	cysteine and glycine-rich protein 1, Csrp1	0.376	0.00669353		853.82	321.46
1436678_at	sarcoglycan, beta (dystrophin-associated glycoprotein), Sgcb	0.376	0.0283464		50.79	19.09
1449877_s_at	kinesin family member C1, Kifc1	0.376	0.00108808		79.63	29.94
1460521_a_at	oligonucleotide/oligosaccharide-binding fold containing 2A, Obfc2a	0.376	0.00947225		205.99	77.5
1455287_at	cyclin-dependent kinase 6, Cdk6	0.377	0.0160532		1750.85	660.89
1455885_at	archaelysin family metallopeptidase 1, Amz1	0.377	0.00179615		78.44	29.56
1426246_at	protein S (alpha), Pros1	0.378	0.0171523		235.26	88.93
1433711_s_at	sestrin 1, Sesn1	0.379	0.0299557		3024.88	1147.12
1432262_at	family with sequence similarity 63, member A, Fam63a	0.38	0.007864		410.43	155.77
1435315_s_at	fatty acyl CoA reductase 1, Far1	0.38	0.00741052		291.18	110.77
1437074_at	sorting nexin 5, Snx5	0.381	0.0264514		289.16	110.23
1417398_at	related RAS viral (r-ras) oncogene homolog 2, Rras2	0.382	0.0027979		73.79	28.16
1421963_a_at	cell division cycle 25 homolog B (S. pombe), Cdc25b	0.382	0.0187293		220.43	84.17
1424755_at	huntingtin interacting protein 1, Hip1	0.382	0.0435914		384.87	146.98
1429097_at	ring finger protein 150, Rnf150	0.382	0.0477928		1121.12	428.54
1455096_at	fibronectin leucine rich transmembrane protein 2, Flrt2	0.382	0.0394865		192.64	73.51
1420028_s_at	minichromosome maintenance deficient 3 (S. cerevisiae), Mcm3	0.383	0.000506307		547.82	209.91
1449670_x_at	G protein-coupled receptor 137B, Gpr137b	0.383	0.0269983		630.06	241.53
1417506_at	geminin, Gmnn	0.384	0.00440152		649.71	249.58
1420478_at	nucleosome assembly protein 1-like 1, Nap1l1	0.384	0.0219593		2441.68	938.37
1417632_at	ATPase, H+ transporting, lysosomal V0 subunit A1, Atp6v0a1	0.385	0.00472197		1479.56	569.54
1443703_at	CD28 antigen, Cd28	0.385	0.0265483		16.6	6.39
1444735_at		0.385	0.021798		144.53	55.63
1422191_at	CD200 receptor 1, Cd200r1	0.386	0.00253078		1398.41	539.51
1430332_a_at	glucuronidase, beta, Gusb	0.386	0.00988412		3608.81	1394.19
1431430_s_at	tripartite motif-containing 59, Trim59	0.386	0.00152694		77.07	29.73
1434911_s_at	Rho GTPase activating protein 19, Arhgap19	0.386	0.0262222		815.97	314.94
1428585_at	actinin, alpha 1, Actn1	0.387	0.0153091		1885.47	729.65
1428842_a_at	nerve growth factor receptor (TNFRSF16) associated protein 1, Ngfrap1	0.387	0.0154279		788.79	305.43
1433892_at	sperm associated antigen 5, Spag5	0.387	0.0132389		34.19	13.24
1423463_a_at	DNA segment, Chr 2, ERATO Doi 750, expressed, D2Ertd750e	0.388	0.0126875		45.49	17.63
1429227_x_at	nucleosome assembly protein 1-like 1, Nap1l1	0.388	0.0232758		1469.01	570.1
1431133_at	Rho GTPase activating protein 18, Arhgap18	0.388	0.00917777		275.82	107.14
1435034_at	RNA polymerase II associated protein 2, Rpap2	0.388	8.49901e-05		38.46	14.93
1435292_at	TBC1 domain family, member 4, Tbc1d4	0.388	0.0350682		269.97	104.77
1453226_at	kinesin family member 18B, Kif18b	0.388	0.0206192		128.02	49.61
1426002_a_at	cell division cycle 7 (S. cerevisiae), Cdc7	0.389	0.00688532		36.39	14.14
1417445_at	NDC80 homolog, kinetochore complex component (S. cerevisiae), Ndc80	0.39	0.00244341		116.49	45.39
1442019_at		0.39	0.00835236		480.05	187.4
1434079_s_at	minichromosome maintenance deficient 2 mitotin (S. cerevisiae), Mcm2	0.391	0.00131418		667.4	260.98
1450138_a_at	serine (or cysteine) peptidase inhibitor, clade B, member 6a, Serpinb6a	0.391	0.0112948		6534.19	2553.45
1426371_at	fatty acyl CoA reductase 1, Far1	0.392	0.000195366		295.75	116.08
1435394_s_at	ras homolog gene family, member C, Rhoc	0.392	0.01896		2187.87	858.27
1449708_s_at	checkpoint kinase 1 homolog (S. pombe), Chek1	0.392	0.0337049		49.74	19.49
1416762_at	S100 calcium binding protein A10 (calpactin), S100a10	0.393	0.011742		3039	1193.21
1417133_at	peripheral myelin protein 22, Pmp22	0.393	0.0121014		4820.6	1892.54
1419098_at	stomatin, Stom	0.393	0.00114344		779.11	306.39
1421547_at	CD180 antigen, Cd180	0.393	0.0116805		1539.07	604.53
1425810_a_at	cysteine and glycine-rich protein 1, Csrp1	0.393	0.0119375		682.29	267.95
1450435_at	L1 cell adhesion molecule, L1cam	0.393	0.0488817		192.83	75.69
1415997_at	thioredoxin interacting protein, Txnip	0.394	0.0190689		4105.59	1616.15
1420498_a_at	disabled homolog 2 (Drosophila), Dab2	0.394	0.0407143		6885.79	2713.55
1426653_at	minichromosome maintenance deficient 3 (S. cerevisiae), Mcm3	0.394	0.0044741		445.73	175.61
1423714_at	ASF1 anti-silencing function 1 homolog B (S. cerevisiae), Asf1b	0.395	0.00149099		410.64	162.1
1430516_at	RIKEN cDNA 4930428B01 gene, 4930428B01Rik	0.395	0.00482588		134.4	53.09
1436186_at	E2F transcription factor 8, E2f8	0.396	0.00203981		120.87	47.86
1446284_at	metastasis suppressor 1, Mtss1	0.396	0.0173478		62.69	24.82
1415886_at	SH2 domain containing 3C, Sh2d3c	0.397	0.0215504		301.95	119.97
1434909_at	Ras-related GTP binding D, Rragd	0.397	0.00394771		178.32	70.82
1442542_at	eyes absent 4 homolog (Drosophila), Eya4	0.397	0.010449		74.43	29.56
1460330_at	annexin A3, Anxa3	0.397	0.013477		2668.45	1058.79
1451970_at	diacylglycerol lipase, beta, Daglb	0.398	0.0318375		758.8	301.96
1421727_at	eyes absent 1 homolog (Drosophila), Eya1	0.399	0.00125568		71.11	28.39
1439929_at		0.399	0.025317		98.75	39.42
1449519_at	growth arrest and DNA-damage-inducible 45 alpha, Gadd45a	0.399	0.044266		204.99	81.79
1417378_at	cell adhesion molecule 1, Cadm1	0.4	0.019567		394.82	157.81
1429270_a_at	synaptonemal complex central element protein 2, Syce2	0.4	0.0253844		324.68	129.94
1442760_x_at		0.401	0.0285575		158.81	63.74
1452598_at	GINS complex subunit 1 (Psf1 homolog), Gins1	0.401	0.0141574		170.47	68.28
1455337_at	FYVE, RhoGEF and PH domain containing 4, Fgd4	0.401	0.0392745		341.45	137.03
1458947_at		0.401	0.020036		407.62	163.43
1433695_at	cannabinoid receptor interacting protein 1, Cnrip1	0.402	0.0409647		183.34	73.73
1437069_at	oxysterol binding protein-like 8, Osbpl8	0.402	0.0139714		1520.29	611.18
1423920_at	non-SMC condensin I complex, subunit H, Ncaph	0.403	0.0115392		212.13	85.56
1442116_at	G protein-coupled receptor 176, Gpr176	0.403	0.00693837		176.75	71.3
1445420_at		0.403	0.000627517		28.97	11.67
1447040_at		0.403	0.0449579		37.25	15.01
1448466_at	cell division cycle associated 5, Cdca5	0.403	0.0101268		168.85	68.05
1450872_s_at	lysosomal acid lipase A, Lipa	0.403	0.00571921		7001.33	2824.77
1426652_at	minichromosome maintenance deficient 3 (S. cerevisiae), Mcm3	0.404	0.0207001		273.32	110.43
1417450_a_at	transforming, acidic coiled-coil containing protein 3, Tacc3	0.405	0.0174274		155.66	63.02
1421027_a_at	myocyte enhancer factor 2C, Mef2c	0.405	0.045358		570.24	230.7
1423795_at	splicing factor proline/glutamine rich (polypyrimidine tract binding protein associated), Sfpq	0.406	0.00036442		493.21	200.43
1431686_a_at	glia maturation factor, beta, Gmfb	0.406	0.00259427		331.68	134.58
1425603_at	transmembrane protein 176A, Tmem176a	0.408	0.0343841		1280.89	522.22
1419289_a_at	synaptogyrin 1, Syngr1	0.409	0.0439622		1954.28	799.74
1424630_a_at	breast cancer 1, Brca1	0.409	0.0339819		23.17	9.48
1426655_a_at	family with sequence similarity 63, member A, Fam63a	0.409	0.00279029		388.36	158.73
1427367_at	EF-hand calcium binding domain 4A, Efcab4a	0.409	0.0474614		286.04	116.89
1437152_at	mex3 homolog B (C. elegans), Mex3b	0.409	0.0152313		25.77	10.55
1456642_x_at	S100 calcium binding protein A10 (calpactin), S100a10	0.409	0.0318315		1539.22	629.42
1427541_x_at	hyaluronan mediated motility receptor (RHAMM), Hmmr	0.41	0.0496204		78.82	32.32
1455609_at	citron, Cit	0.41	0.0117789		124.24	50.93
1420610_at	protein kinase, cAMP dependent, catalytic, beta, Prkacb	0.411	0.00273724		539.03	221.55
1453572_a_at	proteolipid protein 2, Plp2	0.411	0.0303913		5385.32	2213.58
1435635_at	protein-L-isoaspartate (D-aspartate) O-methyltransferase domain containing 1, Pcmtd1	0.412	0.00331513		138.21	57
1439283_at	oxysterol binding protein-like 9, Osbpl9	0.413	0.00582006		56.87	23.47
1454984_at	leukemia inhibitory factor receptor, Lifr	0.413	0.0401357		143.89	59.43
1460559_at	KN motif and ankyrin repeat domains 2, Kank2	0.413	0.0196412		111.1	45.89
1434748_at	cytoskeleton associated protein 2, Ckap2	0.414	0.017279		82.87	34.31
1448207_at	LIM and SH3 protein 1, Lasp1	0.414	0.0142072		534.03	220.87
1449818_at	ATP-binding cassette, sub-family B (MDR/TAP), member 4, Abcb4	0.414	0.00784041		250.86	103.82
1416214_at	minichromosome maintenance deficient 4 homolog (S. cerevisiae), Mcm4	0.415	0.00508813		461.71	191.72
1423757_x_at	insulin-like growth factor binding protein 4, Igfbp4	0.415	0.0179164		918.19	380.89
1429295_s_at	thyroid hormone receptor interactor 13, Trip13	0.415	0.0196977		268.69	111.52
1433775_at	expressed sequence C77080, C77080	0.415	0.00537893		666.63	276.67
1450062_a_at	melanoma antigen, family D, 1, Maged1	0.415	0.0443341		194.2	80.53
1419099_x_at	stomatin, Stom	0.416	0.00185526		817.48	340.23
1420547_at	galactosylceramidase, Galc	0.417	0.0231146		226.38	94.47
1426584_a_at	sorbitol dehydrogenase, Sord	0.417	0.00422214		630.24	263.01
1428509_at	myosin IE, Myo1e	0.417	0.0135102		1232.04	514.35
1428713_s_at	GINS complex subunit 2 (Psf2 homolog), Gins2	0.417	0.00764675		515.03	214.8
1456439_x_at	microtubule associated monoxygenase, calponin and LIM domain containing 1, Mical1	0.417	0.0226386		221.84	92.49
1421991_a_at	insulin-like growth factor binding protein 4, Igfbp4	0.421	0.00204775		355.69	149.68
1419276_at	ectonucleotide pyrophosphatase/phosphodiesterase 1, Enpp1	0.422	0.0325795		125.7	53.03
1425581_s_at	UDP-N-acetyl-alpha-D-galactosamine: polypeptide N-acetylgalactosaminyltransferase 7, Galnt7	0.422	0.0213081		240.91	101.62
1458802_at	human immunodeficiency virus type I enhancer binding protein 3, Hivep3	0.422	0.00121165		267.47	112.82
1423520_at	lamin B1, Lmnb1	0.424	0.00480593		131.66	55.79
1425863_a_at	protein tyrosine phosphatase, receptor type, O, Ptpro	0.424	0.0205888		665.76	282.44
1443341_at		0.424	0.0265143		63.62	26.97
1418457_at	chemokine (C-X-C motif) ligand 14, Cxcl14	0.425	0.0199676		158.41	67.27
1435050_at	DNA segment, Chr 10, Brigham & Women's Genetics 1379 expressed, D10Bwg1379e	0.425	0.0222399		49.2	20.9
1450040_at	tissue inhibitor of metalloproteinase 2, Timp2	0.425	0.0291298		425.05	180.67
1417947_at	proliferating cell nuclear antigen, Pcna	0.426	0.00118062		9803.18	4177.35
1426784_at	tripartite motif-containing 47, Trim47	0.426	0.0230278		300.02	127.83
1439422_a_at	family with sequence similarity 132, member A, Fam132a	0.426	0.0338798		483.71	206.04
1430391_a_at	ST8 alpha-N-acetyl-neuraminide alpha-2,8-sialyltransferase 4, St8sia4	0.427	0.0362128		90.65	38.7
1450881_s_at	G protein-coupled receptor 137B, Gpr137b	0.427	0.00636698		2062.39	879.62
1452098_at	CTF18, chromosome transmission fidelity factor 18 homolog (S. cerevisiae), Chtf18	0.427	0.00552023		51.67	22.04
1417926_at	non-SMC condensin II complex, subunit G2, Ncapg2	0.428	0.00558831		671.31	287.56
1422607_at	ets variant gene 1, Etv1	0.428	0.0213925		125.66	53.83
1425965_at	ubiquitin C, Ubc	0.428	0.00785678		149.78	64.18
1453341_a_at	transmembrane protein 202, Tmem202	0.429	0.022316		79.05	33.91
1450786_x_at	PDZ and LIM domain 5, Pdlim5	0.43	0.00950961		207.91	89.41
1458969_at	expressed sequence AU019559, AU019559	0.43	0.000233578		148.26	63.79
1420679_a_at	androgen-induced 1, Aig1	0.431	0.0148889		178.74	77.1
1421960_at	adenylate cyclase 3, Adcy3	0.431	0.042861		178.8	77.15
1426369_at	fatty acyl CoA reductase 1, Far1	0.431	0.000949404		223.43	96.3
1438321_x_at	family with sequence similarity 63, member A, Fam63a	0.431	0.00150042		1866.66	804.85
1443534_at		0.431	0.0317179		215.51	92.78
1459900_at	expressed sequence C79468, C79468	0.431	0.0226532		234.16	101
1416774_at	WEE 1 homolog 1 (S. pombe), Wee1	0.432	0.0189331		111.13	48.03
1427385_s_at	actinin, alpha 1, Actn1	0.432	0.0359464		186.65	80.59
1428229_at	protein kinase D3, Prkd3	0.432	0.012529		265.82	114.91
1432646_a_at	RIKEN cDNA 2900097C17 gene, 2900097C17Rik	0.432	0.0208255		358.31	154.69
1438496_a_at	DEAD/H (Asp-Glu-Ala-Asp/His) box polypeptide 26B, Ddx26b	0.432	0.0360344		79.78	34.47
1426656_at	family with sequence similarity 63, member A, Fam63a	0.433	0.00803611		1069.72	462.74
1434850_at	IQ motif containing GTPase activating protein 3, Iqgap3	0.433	0.0413128		177.17	76.75
1440924_at	kinesin family member 20B, Kif20b	0.433	0.00919104		22.47	9.72
1453769_at	cytoskeleton associated protein 2-like, Ckap2l	0.433	0.0214562		117.85	51.03
1419932_s_at		0.434	0.00239209		74.73	32.4
1453956_a_at	cyclin-dependent kinase 14, Cdk14	0.434	0.0373163		71.06	30.83
1420808_at	predicted gene 6768 /// nuclear receptor coactivator 4, Gm6768 /// Ncoa4	0.436	0.000550588		2850.08	1242.1
1429294_at	thyroid hormone receptor interactor 13, Trip13	0.437	0.00451715		123.66	54.09
1456918_at	Ras association (RalGDS/AF-6) and pleckstrin homology domains 1, Raph1	0.437	0.010329		187.29	81.79
1418749_at	pleckstrin and Sec7 domain containing 3, Psd3	0.439	0.008597		206.61	90.64
1435492_at	suppressor of cytokine signaling 6, Socs6	0.439	0.0138763		126.28	55.45
1449060_at	kinesin family member 2C, Kif2c	0.439	0.00757047		138.86	60.91
1428410_at	N(alpha)-acetyltransferase 50, NatE catalytic subunit, Naa50	0.44	0.00174994		298.31	131.13
1429734_at	RIKEN cDNA 4632434I11 gene, 4632434I11Rik	0.44	0.00269197		73.31	32.25
1434228_at	pyruvate dehyrogenase phosphatase catalytic subunit 1, Pdp1	0.44	0.00812614		301.19	132.67
1448213_at	annexin A1, Anxa1	0.44	0.00979673		12878.5	5668.28
1417299_at	NIMA (never in mitosis gene a)-related expressed kinase 2, Nek2	0.441	0.00583731		28.05	12.37
1431358_at	RIKEN cDNA 4930547N16 gene, 4930547N16Rik	0.441	0.00701976		28.44	12.55
1419172_at	dihydrofolate reductase, Dhfr	0.442	0.0312577		80.17	35.4
1437150_at	family with sequence similarity 110, member B, Fam110b	0.442	0.043586		74.2	32.79
1420893_a_at	transforming growth factor, beta receptor I, Tgfbr1	0.443	0.0235675		170.28	75.4
1436349_at	RIKEN cDNA 2700094K13 gene, 2700094K13Rik	0.444	0.00241656		1028.77	456.9
1451570_a_at	family with sequence similarity 92, member A, Fam92a	0.444	0.026534		373.54	165.73
1438040_a_at	heat shock protein 90, beta (Grp94), member 1, Hsp90b1	0.446	0.0191676		3159.64	1408.78
1416959_at	nuclear receptor subfamily 1, group D, member 2, Nr1d2	0.447	0.0262152		98.64	44.05
1423499_at	synuclein, alpha interacting protein (synphilin), Sncaip	0.447	0.0140211		32.87	14.68
1426952_at	Rho GTPase activating protein 18, Arhgap18	0.447	0.00886047		354.23	158.5
1435680_a_at	dipeptidylpeptidase 7, Dpp7	0.447	0.00227443		1011.87	452.28
1452241_at	topoisomerase (DNA) II binding protein 1, Topbp1	0.447	0.0147996		464.49	207.66
1452115_a_at	polo-like kinase 4 (Drosophila), Plk4	0.448	0.00239644		60.36	27.06
1455538_at	RIKEN cDNA 6330403M23 gene, 6330403M23Rik	0.448	0.00716774		167.07	74.77
1416601_a_at	regulator of calcineurin 1, Rcan1	0.449	0.0356014		191.11	85.82
1450862_at	RAD54 like (S. cerevisiae), Rad54l	0.449	0.00422367		166.96	75.04
1416433_at	replication protein A2, Rpa2	0.45	0.00555338		236.27	106.26
1417481_at	receptor (calcitonin) activity modifying protein 1, Ramp1	0.45	0.0438829		152.26	68.54
1430191_at	RIKEN cDNA 9130004J05 gene, 9130004J05Rik	0.45	0.00187729		130.12	58.54
1415773_at	nucleolin, Ncl	0.451	0.0302345		1341.41	604.9
1424143_a_at	chromatin licensing and DNA replication factor 1, Cdt1	0.451	0.0108571		1862.18	839.36
1429979_a_at	solute carrier family 38, member 10, Slc38a10	0.451	0.0364798		416.54	187.77
1436174_at	ATPase family, AAA domain containing 2, Atad2	0.451	0.013112		349.96	157.73
1460291_at	cyclin-dependent kinase 6, Cdk6	0.451	0.00401991		118.83	53.57
1424144_at	chromatin licensing and DNA replication factor 1, Cdt1	0.452	0.00268725		1001.17	452.13
1437216_at	coiled coil domain containing 88A, Ccdc88a	0.452	0.013734		144.44	65.32
1454744_at	RIKEN cDNA F630043A04 gene, F630043A04Rik	0.452	0.00832636		19.72	8.91
1456255_at	expressed sequence AI314180, AI314180	0.452	0.0182608		135.71	61.33
1446720_at		0.453	0.0310662		60.27	27.32
1437046_x_at	family with sequence similarity 63, member A, Fam63a	0.454	0.00916011		1185.16	538.12
1448233_at	prion protein, Prnp	0.454	0.0155653		694.4	315.1
1423164_at	G protein-coupled receptor 137B /// G protein-coupled receptor 137B, pseudogene, Gpr137b /// Gpr137b-ps	0.455	0.00801473		798.18	362.93
1437502_x_at	CD24a antigen, Cd24a	0.455	0.0481823		14.52	6.61
1456553_at		0.455	0.0360468		26.74	12.17
1428167_a_at	myelin protein zero-like 1, Mpzl1	0.456	0.0424081		17.91	8.16
1434510_at	3'-phosphoadenosine 5'-phosphosulfate synthase 2, Papss2	0.456	0.0150927		109.85	50.09
1449341_a_at	stomatin, Stom	0.456	0.000163379		956.29	436.41
1458440_at	sperm antigen with calponin homology and coiled-coil domains 1, Specc1	0.456	0.000364635		394.17	179.71
1427275_at	structural maintenance of chromosomes 4, Smc4	0.457	0.0374691		426.19	194.75
1429228_at	RIKEN cDNA 4930534B04 gene, 4930534B04Rik	0.457	0.0479202		53.15	24.27
1452232_at	UDP-N-acetyl-alpha-D-galactosamine: polypeptide N-acetylgalactosaminyltransferase 7, Galnt7	0.457	0.00684532		328.71	150.3
1415904_at	lipoprotein lipase, Lpl	0.458	0.0435997		14921.7	6840.59
1419838_s_at	polo-like kinase 4 (Drosophila), Plk4	0.458	0.0231511		167.51	76.74
1432013_a_at	family with sequence similarity 54, member A, Fam54a	0.458	0.0083173		134.13	61.49
1441360_at		0.458	0.00470457		51.91	23.78
1443037_at		0.458	0.0157938		128.42	58.84
1417111_at	mannosidase 1, alpha, Man1a	0.459	0.00211518		949.53	435.67
1427504_s_at	serine/arginine-rich splicing factor 2, Srsf2	0.459	0.0409744		1867.81	857.53
1428140_at	3-oxoacid CoA transferase 1, Oxct1	0.46	0.00218488		1190.94	547.68
1460324_at	DNA methyltransferase 3A, Dnmt3a	0.46	0.0210432		275.3	126.57
1420554_a_at	RAS-related C3 botulinum substrate 3, Rac3	0.461	0.0256174		392.15	180.78
1439650_at	reticulon 4, Rtn4	0.461	0.0413977		236.16	108.89
1423919_at	HAUS augmin-like complex, subunit 3, Haus3	0.462	0.00730228		182.48	84.31
1426362_at	transmembrane protein 144, Tmem144	0.462	0.0317253		158.47	73.16
1444750_at		0.462	0.0225306		49.49	22.88
1424766_at	excision repair cross-complementing rodent repair deficiency complementation group 6 - like, Ercc6l	0.463	0.0213416		131	60.63
1427094_at	polymerase (DNA directed), epsilon 2 (p59 subunit), Pole2	0.463	0.00631581		163.1	75.58
1448429_at	glycogenin, Gyg	0.463	0.0169956		2602.55	1204.22
1416773_at	WEE 1 homolog 1 (S. pombe), Wee1	0.464	0.0351895		370.81	172.17
1417069_a_at	glia maturation factor, beta, Gmfb	0.464	0.0179962		317.45	147.36
1435134_at	arylacetamide deacetylase-like 1, Nceh1	0.464	0.0117044		997.39	463.1
1438009_at	predicted gene 11276 /// histone cluster 1, H2ao, Gm11276 /// Hist1h2ao	0.464	0.000885844		3994.53	1852.58
1449705_x_at	minichromosome maintenance deficient 3 (S. cerevisiae), Mcm3	0.464	0.00307872		412.65	191.47
1452459_at	asp (abnormal spindle)-like, microcephaly associated (Drosophila), Aspm	0.464	0.0330865		45.4	21.08
1425850_a_at	NIMA (never in mitosis gene a)-related expressed kinase 6, Nek6	0.465	0.0249529		461.94	214.94
1426179_a_at	twisted gastrulation homolog 1 (Drosophila), Twsg1	0.465	0.043755		69.69	32.39
1424176_a_at	annexin A4, Anxa4	0.466	0.0240812		5347.71	2490.12
1428483_a_at	RIKEN cDNA 2610039C10 gene, 2610039C10Rik	0.466	0.0213475		206.38	96.08
1452843_at	interleukin 6 signal transducer, Il6st	0.466	0.013767		620.04	288.88
1450627_at	progressive ankylosis, Ank	0.467	0.0242479		590.18	275.66
1429156_at	centromere protein W, Cenpw	0.468	0.000214621		96.72	45.29
1438183_x_at	sorbitol dehydrogenase, Sord	0.468	0.0088424		187.95	87.89
1450939_at	ectonucleoside triphosphate diphosphohydrolase 1, Entpd1	0.468	0.0381544		428.33	200.51
1458668_at	tumor protein D52, Tpd52	0.468	0.0102214		698.81	326.95
1415893_at	sphingosine phosphate lyase 1, Sgpl1	0.469	0.00398813		1652.8	775.95
1437635_at	discoidin, CUB and LCCL domain containing 2, Dcbld2	0.469	0.0342692		64.99	30.5
1424927_at	GLI pathogenesis-related 1 (glioma), Glipr1	0.47	0.00301113		5295.65	2486.81
1438906_at		0.47	0.00614433		89.82	42.25
1438983_x_at	VPS33B interacting protein, apical-basolateral polarity regulator, Vipar	0.47	0.000559669		2335.59	1098.59
1452696_a_at	RIKEN cDNA 4933439C10 gene, 4933439C10Rik	0.47	0.00274493		76.76	36.09
1458374_at	expressed sequence C79407, C79407	0.47	0.00551624		98.21	46.2
1416575_at	cell division cycle 45 homolog (S. cerevisiae), Cdc45	0.471	0.00464854		129.97	61.2
1419692_a_at	leukotriene C4 synthase, Ltc4s	0.471	0.0299418		152.41	71.74
1431178_at	UL16 binding protein 1, Ulbp1	0.471	0.00519097		74.48	35.07
1435938_at	cytoskeleton associated protein 2-like, Ckap2l	0.471	0.000428108		211.85	99.73
1417110_at	mannosidase 1, alpha, Man1a	0.472	0.00917733		540.78	255.09
1439091_at	Fanconi anemia, complementation group D2, Fancd2	0.472	0.0180701		58.22	27.48
1417492_at	cathepsin B, Ctsb	0.473	0.00670205		8227.11	3890.75
1420567_at	protein kinase D3, Prkd3	0.473	0.0079653		73.93	34.99
1434767_at	expressed sequence C79407, C79407	0.473	0.0139096		97.57	46.12
1437772_s_at	fucosidase, alpha-L- 1, tissue, Fuca1	0.473	0.0215458		1525.73	721.52
1455000_at	G protein-coupled receptor 68, Gpr68	0.473	0.0453296		112.53	53.25
1433645_at	solute carrier family 44, member 1, Slc44a1	0.474	0.0255672		908.66	430.91
1451562_at	AIG2-like domain 1, A2ld1	0.474	0.0153877		112.25	53.21
1455488_at	HAUS augmin-like complex, subunit 6, Haus6	0.474	0.037813		55.91	26.48
1417090_at	reticulocalbin 1, Rcn1	0.475	0.0284678		141.53	67.17
1452283_at	Ras association (RalGDS/AF-6) domain family (N-terminal) member 8, Rassf8	0.475	0.0121033		315.76	149.86
1455206_at	ribosomal protein S6 kinase polypeptide 3, Rps6ka3	0.475	0.00540044		1027.34	487.5
1417015_at	Ras association (RalGDS/AF-6) domain family member 3, Rassf3	0.476	0.0137166		98.21	46.73
1449402_at	carbohydrate (N-acetylglucosamino) sulfotransferase 7, Chst7	0.476	0.04746		93.21	44.36
1451483_s_at	RIKEN cDNA 1700054N08 gene, 1700054N08Rik	0.476	0.00599137		185.37	88.19
AFFX-18SRNAMur/X00686_M_at		0.476	0.036282		385.03	183.44
1429775_a_at	G protein-coupled receptor 137B /// G protein-coupled receptor 137B, pseudogene, Gpr137b /// Gpr137b-ps	0.477	0.00495867		3798.08	1810.94
1423813_at	kinesin family member 22, Kif22	0.478	0.0178823		105.93	50.62
1427276_at	structural maintenance of chromosomes 4, Smc4	0.478	0.0344473		244.72	117.08
1450015_x_at	sphingosine-1-phosphate phosphatase 1, Sgpp1	0.478	0.00153502		542.59	259.53
1452309_at	cingulin-like 1, Cgnl1	0.478	0.0297638		179.09	85.62
1436706_at	membrane magnesium transporter 1, Mmgt1	0.479	0.010924		82.05	39.3
1438161_s_at	replication factor C (activator 1) 4, Rfc4	0.479	0.031536		104.88	50.22
1439616_at		0.479	0.0252165		698.8	334.44
1433623_at	zinc finger protein 367, Zfp367	0.48	0.0430063		134.4	64.51
1443208_at		0.48	0.0180392		145.37	69.82
1451103_at	HAUS augmin-like complex, subunit 4, Haus4	0.48	0.00079525		443.24	212.95
1418481_at	protein kinase, membrane associated tyrosine/threonine 1, Pkmyt1	0.481	0.0115642		347.9	167.44
1420731_a_at	cysteine and glycine-rich protein 2, Csrp2	0.481	0.00701247		43.66	21.01
1421890_at	ST3 beta-galactoside alpha-2,3-sialyltransferase 2, St3gal2	0.481	0.034789		106.73	51.33
1455493_at	synaptic nuclear envelope 1, Syne1	0.481	0.00563594		254.22	122.21
1419652_s_at	Na+/K+ transporting ATPase interacting 1, Nkain1	0.482	0.0112949		110.57	53.26
1422862_at	PDZ and LIM domain 5, Pdlim5	0.482	0.00400015		27.2	13.1
1422944_a_at	diaphanous homolog 3 (Drosophila), Diap3	0.482	0.0159915		43.16	20.82
1430617_at	Opa interacting protein 5, Oip5	0.482	0.0408334		35.56	17.15
1433626_at	phospholipid scramblase 4, Plscr4	0.482	0.0480234		24.97	12.04
1424955_at	HAUS augmin-like complex, subunit 1, Haus1	0.484	0.0110764		419.57	202.95
1431395_a_at	IQ motif containing GTPase activating protein 1, Iqgap1	0.484	0.0110295		133.53	64.67
1452907_at	galactosylceramidase, Galc	0.484	0.0138138		1160.1	561.25
1415784_at	vacuolar protein sorting 35, Vps35	0.485	0.0418493		784.04	380.17
1417604_at	calcium/calmodulin-dependent protein kinase I, Camk1	0.485	0.0410587		1009.36	489.53
1415996_at	thioredoxin interacting protein, Txnip	0.486	0.04001		5107.02	2484.5
1416746_at	H2A histone family, member X, H2afx	0.486	0.0191023		677.25	329.3
1437241_at	Kruppel-like factor 11, Klf11	0.486	0.0231132		151.32	73.5
1451230_a_at	WW domain binding protein 5, Wbp5	0.486	0.0494459		1368.37	665.24
1456885_at	septin 8, Sept8	0.486	0.0491395		496.09	240.99
1416130_at	prion protein, Prnp	0.487	0.00705157		299.17	145.56
1427929_a_at	pyridoxal (pyridoxine, vitamin B6) kinase, Pdxk	0.487	0.0199801		3161.36	1540.05
1436902_x_at	thymosin, beta 10, Tmsb10	0.487	0.0454674		5793.77	2824.01
1452042_a_at	transmembrane protein 144, Tmem144	0.487	0.0285118		127.43	62
1426036_a_at	phosphodiesterase 1C, Pde1c	0.488	0.000344459		21.38	10.44
1434352_at	RIKEN cDNA B630005N14 gene, B630005N14Rik	0.488	0.0413899		783.85	382.44
1436763_a_at	Kruppel-like factor 9, Klf9	0.488	0.0176341		29.17	14.24
1449353_at	zinc finger matrin type 3, Zmat3	0.488	0.0464788		698.3	340.86
1449059_a_at	3-oxoacid CoA transferase 1, Oxct1	0.489	0.000954695		3175.39	1553.59
1449262_s_at	lin-7 homolog C (C. elegans), Lin7c	0.489	0.0230284		366.07	179.17
1460121_at	RIKEN cDNA 9630010G10 gene, 9630010G10Rik	0.489	0.0104446		152.26	74.39
1420637_at	phosphoribosyl pyrophosphate synthetase 2, Prps2	0.49	0.00338043		371.15	181.81
1421861_at	calsyntenin 1, Clstn1	0.49	0.0377602		124.66	61.11
1451507_at	myocyte enhancer factor 2C, Mef2c	0.49	0.0412727		252.19	123.56
1424796_at	RIKEN cDNA 1700054N08 gene, 1700054N08Rik	0.491	0.00118975		100.74	49.45
1445363_at	RIKEN cDNA 2810055G20 gene, 2810055G20Rik	0.491	0.0214206		69.87	34.3
1448458_at	topoisomerase (DNA) II beta, Top2b	0.491	0.00522699		34.01	16.71
1455750_at	Ral GTPase activating protein, alpha subunit 2 (catalytic), Ralgapa2	0.491	0.0186854		223.31	109.57
1460047_at		0.491	0.0316484		47.88	23.5
1420727_a_at	trimethyllysine hydroxylase, epsilon, Tmlhe	0.492	0.0108186		327.56	161.01
1424852_at	myocyte enhancer factor 2C, Mef2c	0.492	0.0499546		849.06	418.14
1429095_at	centromere protein P, Cenpp	0.492	0.017168		30.89	15.2
1432436_a_at	adenylate kinase 3, Ak3	0.492	0.00283964		280.77	138.12
1447849_s_at	avian musculoaponeurotic fibrosarcoma (v-maf) AS42 oncogene homolog, Maf	0.492	0.023131		1861.81	915.78
1419693_at	collectin sub-family member 12, Colec12	0.493	0.049883		31.51	15.55
1428105_at	TPX2, microtubule-associated protein homolog (Xenopus laevis), Tpx2	0.493	0.0255421		42.7	21.03
1443864_at	denticleless homolog (Drosophila), Dtl	0.493	0.0136711		27.74	13.68
1419162_s_at	DnaJ (Hsp40) homolog, subfamily C, member 3, Dnajc3	0.494	0.00710054		148.3	73.28
1451803_a_at	vascular endothelial growth factor B, Vegfb	0.494	0.00956776		288.33	142.3
1435054_at	essential meiotic endonuclease 1 homolog 1 (S. pombe), Eme1	0.496	0.00267642		109.42	54.25
1446739_at		0.496	0.0415331		36.1	17.89
1424760_a_at	SET and MYND domain containing 2, Smyd2	0.497	0.00340679		430.86	214.35
1426720_at	amyloid beta (A4) precursor protein-binding, family B, member 2, Apbb2	0.497	0.00166601		121.32	60.26
1429316_at	RasGEF domain family, member 1A, Rasgef1a	0.497	0.0420299		20.69	10.28
1449841_at	kinesin family member 3A, Kif3a	0.497	0.0236249		449.81	223.39
1455291_s_at	zinc and ring finger 2, Znrf2	0.497	0.0221168		371.27	184.38
1424443_at	transmembrane 6 superfamily member 1, Tm6sf1	0.498	0.0135055		907.62	452.31
1426612_at	timeless interacting protein, Tipin	0.498	0.00530632		327.14	162.77
1452300_at	family with sequence similarity 82, member B, Fam82b	0.498	0.00188314		21.84	10.87
1422861_s_at	PDZ and LIM domain 5, Pdlim5	0.499	0.0163954		62.61	31.25
1435952_at	hypothetical LOC100503222, LOC100503222	0.499	0.0455618		72.48	36.15
1417505_s_at	predicted gene 13305 /// predicted gene 2002 /// interleukin 11 receptor, alpha chain 1 /// interleukin 11 receptor, alpha chain 2, Gm13305 /// Gm2002 /// Il11ra1 /// Il11ra2	0.5	0.0468091		689.73	344.95
1422341_s_at	phospholipase A2, group XV, Pla2g15	0.5	0.0101531		1069.84	534.71
1448276_at	tetraspanin 4, Tspan4	0.5	0.016333		1856.29	928.27
