# Supplementary material for: Control of the Inflammatory Macrophage Transcriptional Signature by miR-155
Source: PLoS One. 2016 Jul 22;11(7):e0159724. doi: 10.1371/journal.pone.0159724 (PMC4957803; doi:10.1371/journal.pone.0159724)
Supplement: S4 Table — (XLSX) [file pone.0159724.s005.xlsx]

## Sheet: Table S4
Table S4. M2 macrophage markers compared between WT M1vs. WT M0 and KO M1 vs. KO M0 macrophages
Name	Description	Fold Change WTM1vsWTM0	Fold Change KOM1vsKOM0	p-value WTM1 vs. WTM0	p-value KOM1 vs. KOM0		Mean Class Expr KOM0	Mean Class Expr KOM1	Mean Class Expr WTM0	Mean Class Expr WTM1
1450430_at	mannose receptor, C type 1, Mrc1	0.015	0.05	0.00175809	0.000373646		3317.99	164.97	2672.52	39.51
1427682_a_at	early growth response 2, Egr2	0.074	0.098	6.71104e-05	0.00280223		134.52	13.13	125.82	9.34
1427683_at	early growth response 2, Egr2	0.077	0.126	0.00230337	0.0236474		259.59	32.59	211.32	16.37
1450884_at	CD36 antigen, Cd36	0.135	0.109	8.47043e-05	0.0103739		406.13	44.35	340.73	46.15
1437401_at	insulin-like growth factor 1, Igf1	0.144	0.272	2.25663e-05	0.000213492		2756.65	748.94	2721.12	390.82
1434413_at	insulin-like growth factor 1, Igf1	0.152	0.268	5.17819e-05	0.00440175		3293.13	881.74	2942.75	447.57
1447849_s_at	avian musculoaponeurotic fibrosarcoma (v-maf) AS42 oncogene homolog, Maf	0.161	0.492	0.002447	0.023131		1861.81	915.78	1944.12	313.84
1435828_at	avian musculoaponeurotic fibrosarcoma (v-maf) AS42 oncogene homolog, Maf	0.162	0.564	0.00174072	0.0239833		573.77	323.56	683.95	111
1423140_at	lysosomal acid lipase A, Lipa	0.178	0.29	0.000212671	0.00277886		1953.09	567.3	2061.98	367.01
1423141_at	lysosomal acid lipase A, Lipa	0.21	0.319	3.98239e-08	0.0134005		2347.52	749.47	2142.92	450.85
1419519_at	insulin-like growth factor 1, Igf1	0.212	0.252	0.000225744	0.0169479		1892.52	476.11	1805.32	382.09
1423166_at	CD36 antigen, Cd36	0.258	0.196	0.00065161	0.0198753		7386.81	1444.52	6510.35	1677.33
1417702_a_at	histamine N-methyltransferase, Hnmt	0.259	0.677	0.000310646	0.0545712		192.58	130.32	190.58	49.36
1437473_at	avian musculoaponeurotic fibrosarcoma (v-maf) AS42 oncogene homolog, Maf	0.26	0.792	0.014904	0.378792		534.57	423.2	512.36	133.03
1452014_a_at	insulin-like growth factor 1, Igf1	0.261	0.297	8.84883e-05	0.000768626		6643.14	1976.15	6911.88	1807.05
1428574_a_at	chimerin (chimaerin) 2, Chn2	0.265	0.243	0.000352377	0.0468849		40.73	9.89	40.33	10.67
1450872_s_at	lysosomal acid lipase A, Lipa	0.268	0.403	2.79778e-06	0.00571921		7001.33	2824.77	7007.45	1875.12
1444073_at	avian musculoaponeurotic fibrosarcoma (v-maf) AS42 oncogene homolog, Maf	0.275	0.581	0.000784318	0.0470539		238.49	138.52	227.53	62.6
1456060_at	avian musculoaponeurotic fibrosarcoma (v-maf) AS42 oncogene homolog, Maf	0.288	0.797	0.00156184	0.222135		2433.61	1938.78	2455.08	706.84
1428573_at	chimerin (chimaerin) 2, Chn2	0.29	0.336	0.00707295	0.00317833		41.43	13.92	38.04	11.02
1450883_a_at	CD36 antigen, Cd36	0.323	0.186	0.00476428	0.01195		6328.19	1180.17	5151.27	1664.51
1452141_a_at	selenoprotein P, plasma, 1, Sepp1	0.35	0.589	8.50149e-05	0.0105046		14825.4	8736.01	14541.5	5087.38
1447945_at	avian musculoaponeurotic fibrosarcoma (v-maf) AS42 oncogene homolog, Maf	0.51	0.539	0.0342119	0.110339		112.7	60.78	98.94	50.46
1438292_x_at	adenosine kinase, Adk	0.557	0.901	0.0105073	0.551532		705.84	635.86	675.1	375.94
1434034_at	ceramide kinase, Cerk	0.592	0.753	8.74496e-05	0.315429		1317.97	993.05	1331.08	788.62
1426397_at	transforming growth factor, beta receptor II, Tgfbr2	0.597	0.858	0.0189307	0.0816134		1887.96	1619.77	1889.49	1128
1416319_at	adenosine kinase, Adk	0.604	0.728	0.0155818	0.0383522		231.11	168.34	234.13	141.43
1448710_at	chemokine (C-X-C motif) receptor 4, Cxcr4	0.671	0.718	0.123979	0.422503		584.02	419.47	489.81	328.64
1460180_at	hexosaminidase B, Hexb	0.671	0.608	0.000321874	0.0244326		2729.36	1659.53	2523.68	1694.48
1437874_s_at	hexosaminidase B, Hexb	0.679	0.704	0.000198456	0.0937498		3100.7	2181.87	3476.29	2362.01
1424733_at	purinergic receptor P2Y, G-protein coupled, 14, P2ry14	0.781	1.501	0.205744	0.231159		296.34	444.8	264.03	206.14
1420338_at	arachidonate 15-lipoxygenase, Alox15	0.847	0.982	0.0986279	0.870328		22.05	21.65	22.84	19.34
1423450_a_at	heparan sulfate (glucosamine) 3-O-sulfotransferase 1, Hs3st1	0.848	0.868	0.0789557	0.16783		37.29	32.38	34.15	28.97
1449015_at	resistin like alpha, Retnla	0.856	1.168	0.132509	0.027363		32.86	38.39	33.35	28.55
1425444_a_at	transforming growth factor, beta receptor II, Tgfbr2	0.862	0.695	0.565161	0.0331789		287.8	199.92	229.76	198
1426807_at	Leukotriene A4 hydrolase, Lta4h	0.888	0.885	0.298888	0.309544		17.68	15.64	18.23	16.18
1450242_at	toll-like receptor 5, Tlr5	0.918	1.1	0.0238209	0.40515		59.69	65.63	64.69	59.36
1448061_at	macrophage scavenger receptor 1, Msr1	0.92	1.05	0.323973	0.695947		2182.21	2290.34	1897.94	1745.9
1421767_at	Adenosine kinase, Adk	0.951	1.015	0.588862	0.918111		25.83	26.22	29.12	27.68
1446068_at	adenosine kinase, Adk	0.957	0.932	0.406592	0.609635		11.82	11.02	11.72	11.22
1449641_at	adenosine kinase, Adk	0.968	0.864	0.838726	0.345699		14.02	12.11	14.84	14.36
1446675_at	adenosine kinase, Adk	0.979	0.946	0.812562	0.177204		14.33	13.55	14.07	13.77
1422019_at	transforming growth factor, beta receptor II, Tgfbr2	0.986	1.009	0.779465	0.952511		8.57	8.65	7.97	7.86
1437939_s_at	cathepsin C, Ctsc	0.996	1.94	0.982134	0.0771376		81.12	157.4	100.25	99.83
1416086_at	protein-tyrosine sulfotransferase 2, Tpst2	1.001	1.19	0.982894	0.160488		659.84	785.06	702.98	704
1437218_at	fibronectin 1, Fn1	1.002	1.09	0.984183	0.421616		7.81	8.51	8.2	8.22
1454784_at	heparan sulfate (glucosamine) 3-O-sulfotransferase 2, Hs3st2	1.072	0.966	0.398307	0.859123		15.69	15.15	17.82	19.11
1426642_at	fibronectin 1, Fn1	1.096	0.772	0.784069	0.618248		150.14	115.98	100.06	109.66
1434790_a_at	leukotriene A4 hydrolase, Lta4h	1.101	0.785	0.147771	0.0985318		1267.3	994.45	1165.45	1283.68
1419210_at	histamine receptor H1, Hrh1	1.109	1.121	0.111197	0.438153		10.48	11.75	10.28	11.4
1453528_at	leukotriene A4 hydrolase, Lta4h	1.113	0.933	0.047956	0.592637		75.7	70.66	57.47	63.99
1438624_x_at	heparan sulfate (glucosamine) 3-O-sulfotransferase 2, Hs3st2	1.127	1.018	0.3781	0.886237		20.76	21.13	19.77	22.28
1425434_a_at	macrophage scavenger receptor 1, Msr1	1.135	0.881	0.276047	0.609395		1879.72	1656.38	1621.97	1840.64
1440814_x_at	heparan sulfate (glucosamine) 3-O-sulfotransferase 2, Hs3st2	1.138	1.134	0.102125	0.269284		252.44	286.27	229.46	261.18
1438494_at	histamine receptor H1, Hrh1	1.171	1.382	0.0447002	0.0327276		19.48	26.92	19.28	22.58
1445685_at	growth arrest specific 7, Gas7	1.171	0.883	0.114906	0.622798		50.4	44.49	45.69	53.5
1457266_at	solute carrier family 38, member 6, Slc38a6	1.212	0.947	0.131733	0.226877		901.97	854.07	876.87	1063.18
1422062_at	macrophage scavenger receptor 1, Msr1	1.225	1.207	0.052844	0.257593		3613.58	4361.02	3152.67	3861.38
1457528_at	solute carrier family 4, sodium bicarbonate cotransporter, member 7, Slc4a7	1.298	0.891	0.109102	0.141831		85.48	76.19	80.78	104.87
1457270_at	growth arrest specific 7, Gas7	1.331	1.381	0.0400343	0.0232276		337.19	465.5	288.1	383.44
1419549_at	arginase, liver, Arg1	1.346	1.938	0.0555155	0.158166		9.58	18.57	11.55	15.55
1425435_at	macrophage scavenger receptor 1, Msr1	1.347	1.131	0.0944253	0.457261		199.73	225.96	167.76	225.91
1421855_at	fibrinogen-like protein 2, Fgl2	1.585	2.689	0.197975	0.248537		648.13	1742.76	607.32	962.42
1416382_at	cathepsin C, Ctsc	1.602	1.695	0.000223251	0.0328135		5958.44	10102	6576.1	10537
1431400_a_at	growth arrest specific 7, Gas7	1.612	1	0.015221	0.999473		107.35	107.34	107.91	174
1421854_at	fibrinogen-like protein 2, Fgl2	1.74	2.994	0.129538	0.302779		497.4	1489.37	417.08	725.66
1438673_at	solute carrier family 4, sodium bicarbonate cotransporter, member 7, Slc4a7	1.741	1.126	0.00180629	0.351104		435.13	489.81	383.63	667.87
1455876_at	solute carrier family 4, sodium bicarbonate cotransporter, member 7, Slc4a7	1.777	1.273	0.00180046	0.445933		135.81	172.91	140.88	250.37
1417859_at	growth arrest specific 7, Gas7	2	1.219	0.00138344	0.476903		128.57	156.73	135.34	270.64
1437463_x_at	transforming growth factor, beta induced, Tgfbi	3.264	4.801	0.000900466	0.030891		723.86	3475.46	1098.36	3585.52
1456250_x_at	transforming growth factor, beta induced, Tgfbi	3.684	4.998	0.000333221	0.0335996		1017.55	5085.45	1469.79	5414.13
1448123_s_at	transforming growth factor, beta induced, Tgfbi	4.434	7.079	0.000149732	0.046177		1258.24	8907.65	1839.95	8158.06
1415871_at	transforming growth factor, beta induced, Tgfbi	5.532	7.973	6.55799e-05	0.0843566		627.58	5003.73	854.79	4728.53
